# Supplementary material for: Iridium complexes featuring a tridentate SiPSi ligand: from dimeric to monomeric 14, 16 or 18-electron species
Source: Royal Society of Chemistry journal article supplement (doi:10.1039/c9dt03136g), 2019-01-01
Supplement: c9dt03136g1.pdf [file c9dt03136g1.pdf]

## Electronic Supporting Information

### Iridium complexes featuring a tridentate SiPSi ligand: from dimeric to monomeric 14, 16 or 18-electron species

Cynthia A. Cuevas-Chávez,<sup>a,b</sup> Laure Vendier,<sup>b</sup> Sylviane Sabo-Etienne<sup>b\*</sup> and Virginia Montiel-Palma<sup>a,c\*</sup>

#### Table of content

|                                    |           |
|------------------------------------|-----------|
| <b>1. NMR and IR spectra</b> ..... | <b>2</b>  |
| 1.1 Complex 2 .....                | 2         |
| 1.2 Complex 3 .....                | 5         |
| 1.3 Complex 4 .....                | 8         |
| 1.3 Complexes 5a-d .....           | 11        |
| 1.4 Complex 6b .....               | 13        |
| 1.4 Complex 7b .....               | 15        |
| 1.5 Complexes 7a,b,c .....         | 17        |
| 1.6 Complex 8 .....                | 21        |
| 1.7 Complex 9 .....                | 23        |
| <b>2. X-ray Data</b> .....         | <b>26</b> |
| X-ray data for complex 1 .....     | 26        |
| X-ray data for complex 2 .....     | 27        |
| X-ray Data for complex 3 .....     | 27        |
| X-ray Data for complex 4 .....     | 28        |
| X-ray Data for complex 5a .....    | 29        |
| X-ray Data for complex 7b .....    | 30        |
| X-ray Data for complex 8 .....     | 31        |

# 1. NMR and IR spectra

## 1.1 Complex 2

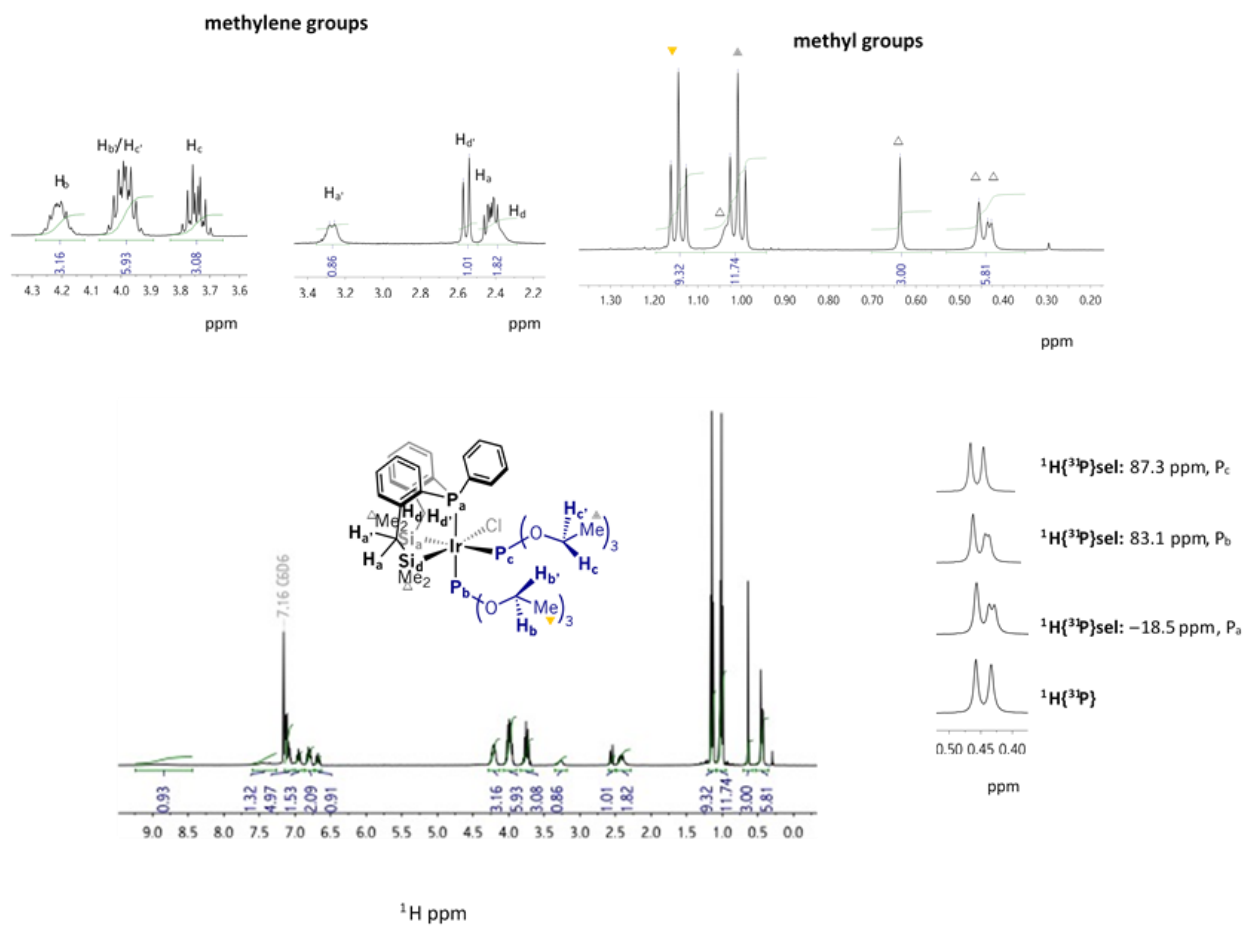

Figure S1.  $^1\text{H}$  NMR spectrum (400 MHz, 298 K,  $\text{C}_6\text{D}_6$ ) of complex 2 and inlets in the methyl and methylene regions.

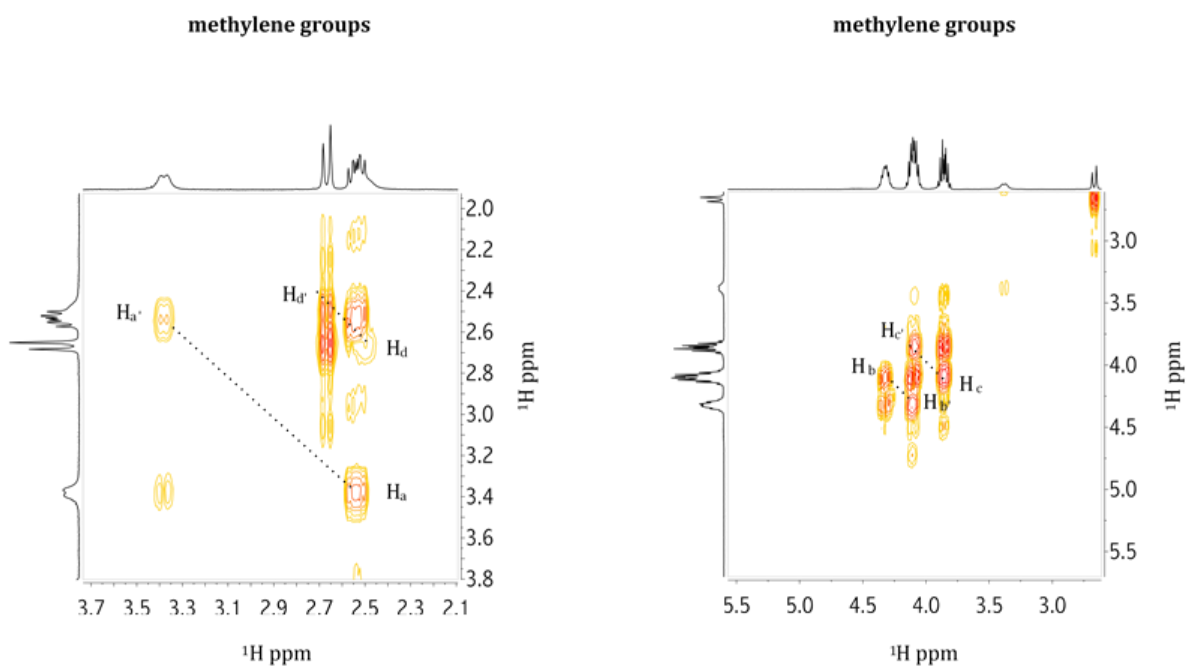

Figure S2.  $^1\text{H}$ - $^1\text{H}$  COSY NMR spectra (298 K,  $\text{C}_6\text{D}_6$ ) of complex **2** in the methylene regions.

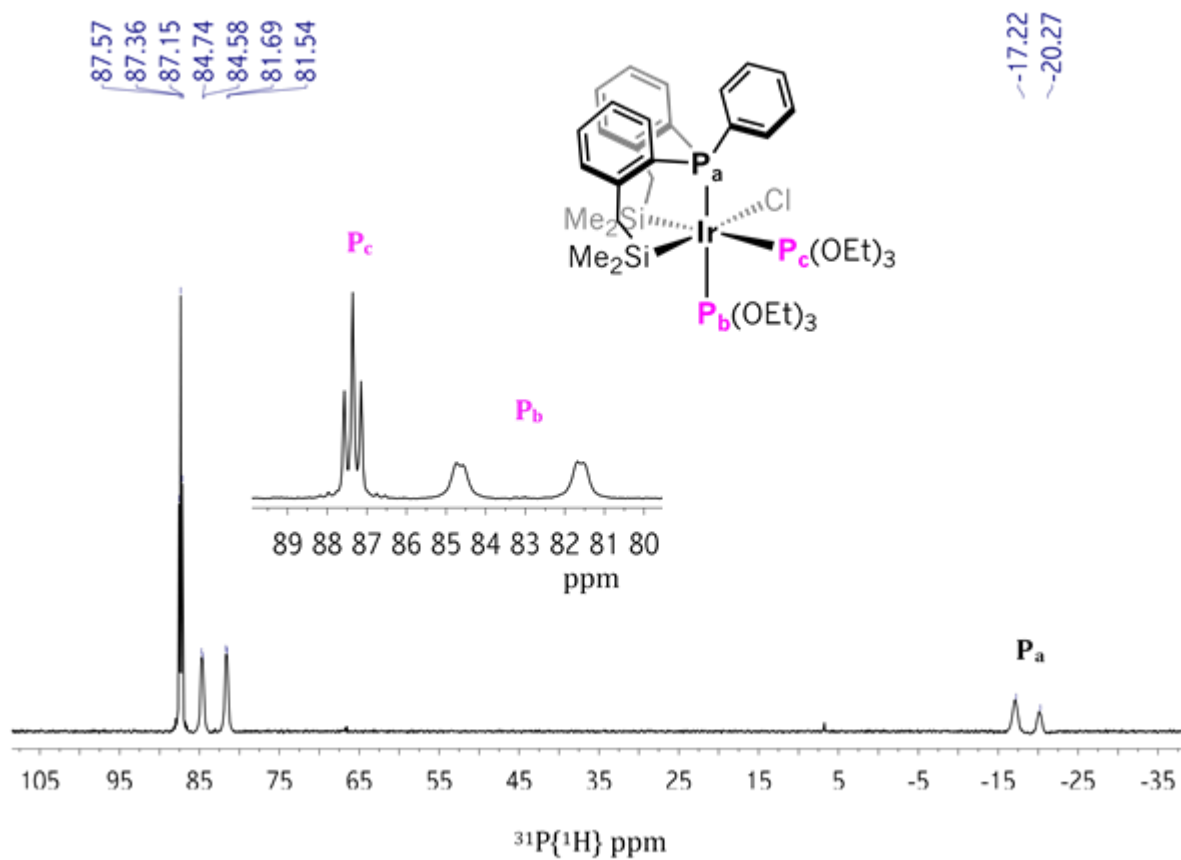

Figure S3.  $^{31}\text{P}\{^1\text{H}\}$  NMR spectrum (161.9 MHz, 298 K,  $\text{C}_6\text{D}_6$ ) of complex **2**.

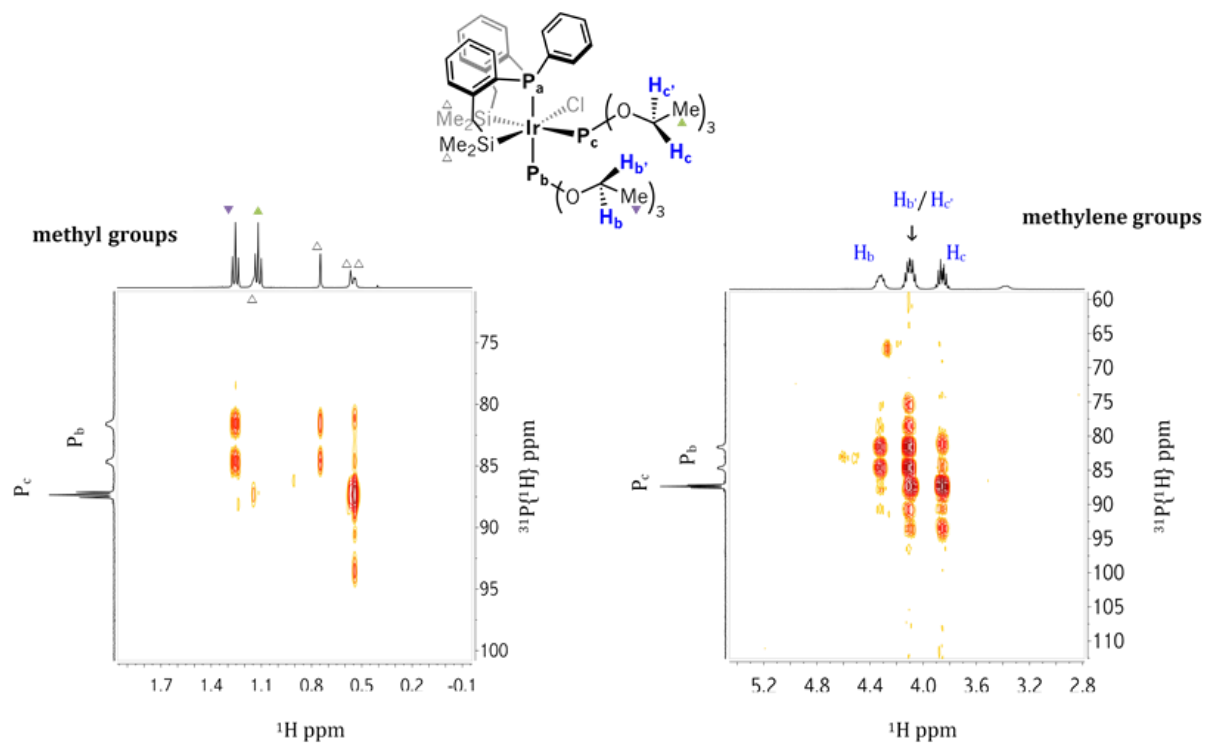

Figure S4.  $^1\text{H}$ - $^{31}\text{P}$  HMQC NMR spectra (298 K,  $\text{C}_6\text{D}_6$ ) of complex **2**.

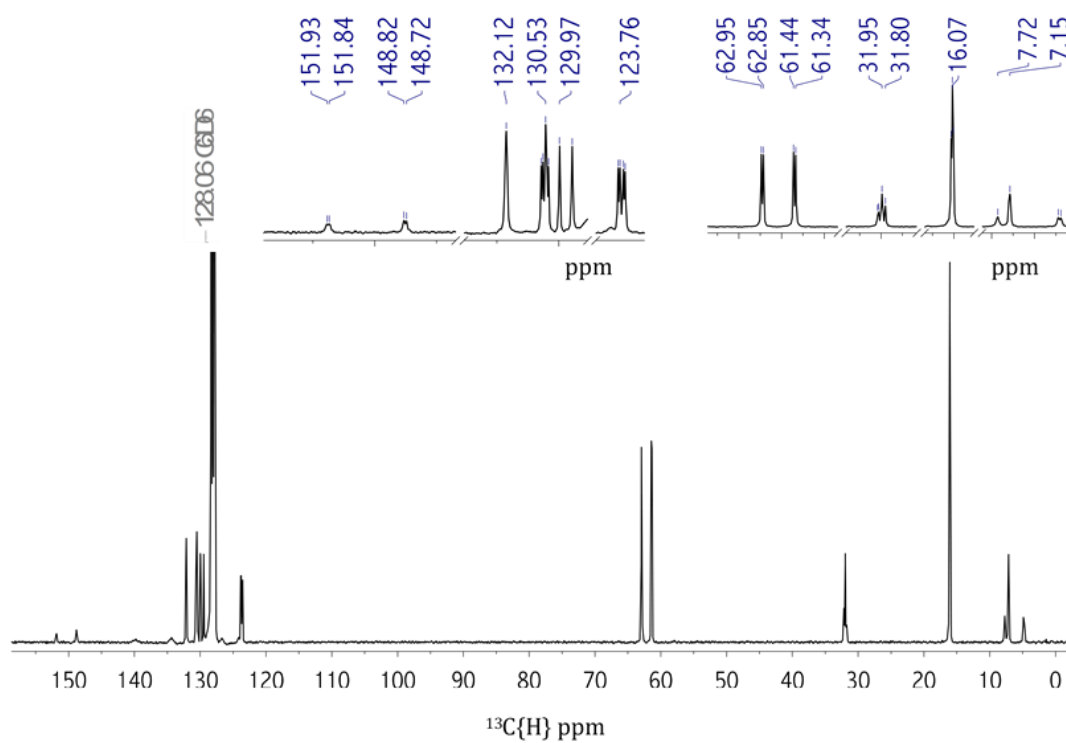

Figure S5.  $^{13}\text{C}\{^1\text{H}\}$  NMR spectrum (100.6 MHz, 298 K,  $\text{C}_6\text{D}_6$ ) of complex **2**.

## 1.2 Complex 3

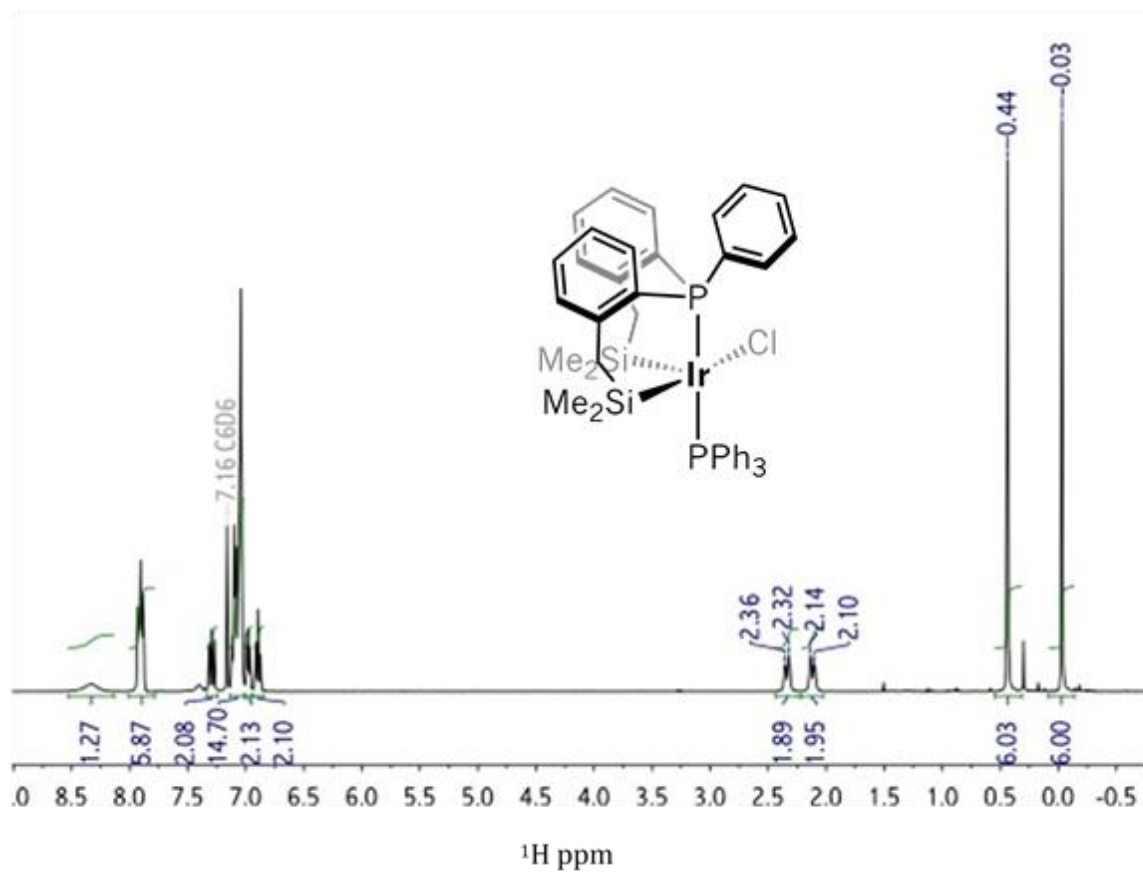

Figure S6.  $^1\text{H}$  NMR spectrum (400 MHz, 298 K,  $\text{C}_6\text{D}_6$ ) of complex **3**.

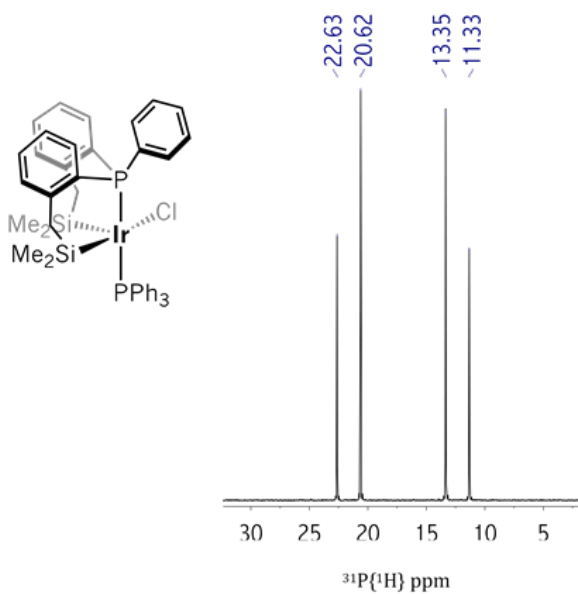

Figure S7.  $^{31}\text{P}\{^1\text{H}\}$  NMR spectrum (161.9 MHz, 298 K,  $\text{C}_6\text{D}_6$ ) of complex **3**.

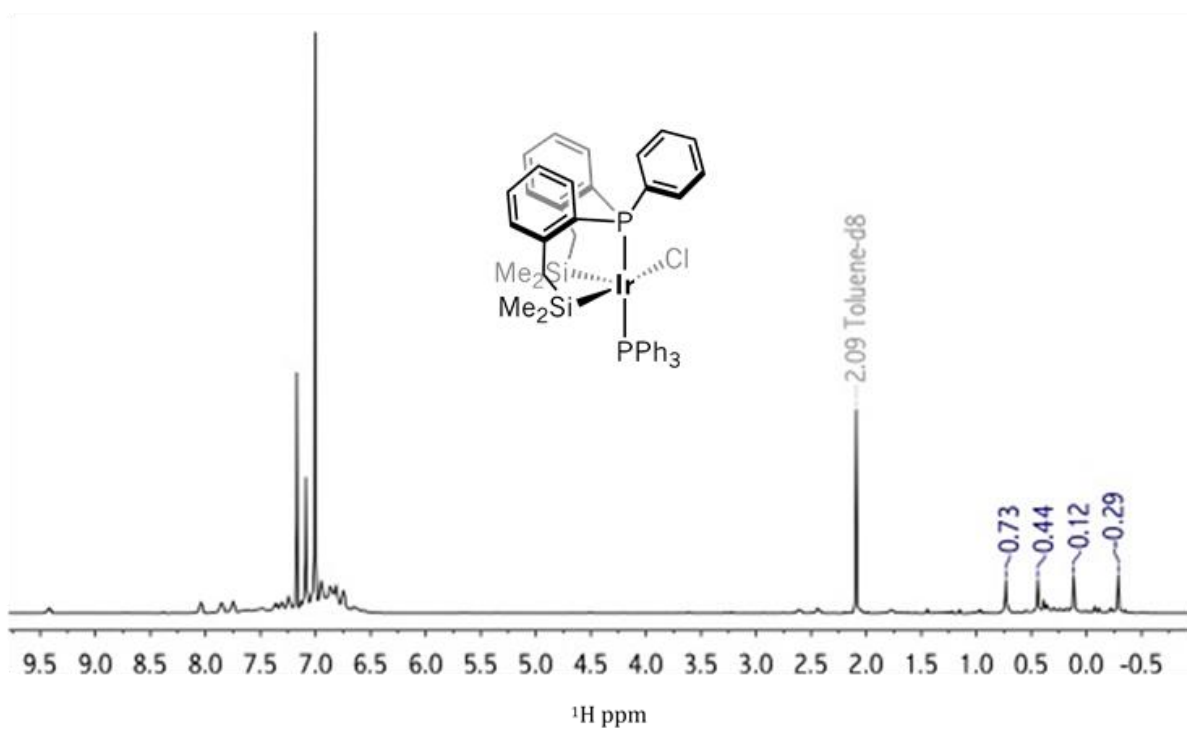

Figure S8.  $^1\text{H}$  NMR spectrum (600 MHz, 193 K,  $\text{tol-}d_8$ ) of complex **3**.

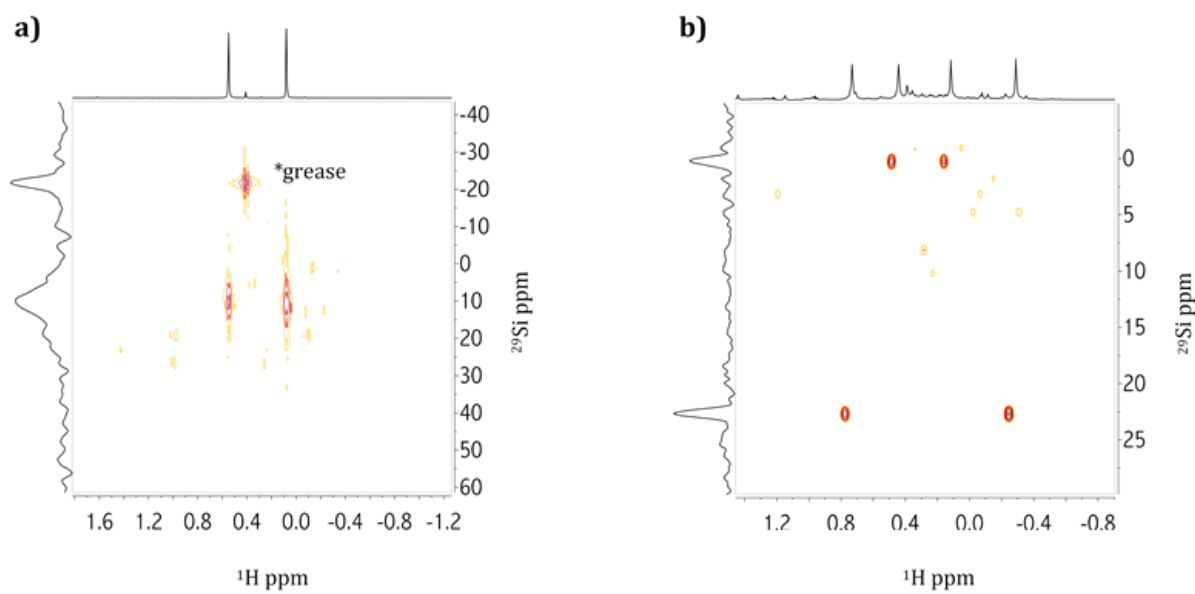

Figure S9.  $^1\text{H}$ - $^{29}\text{Si}$  HMQC NMR spectra **a)** at 298 K in  $\text{C}_6\text{D}_6$ ; **b)** at 193 K in  $\text{tol-}d_8$  of complex **3**.

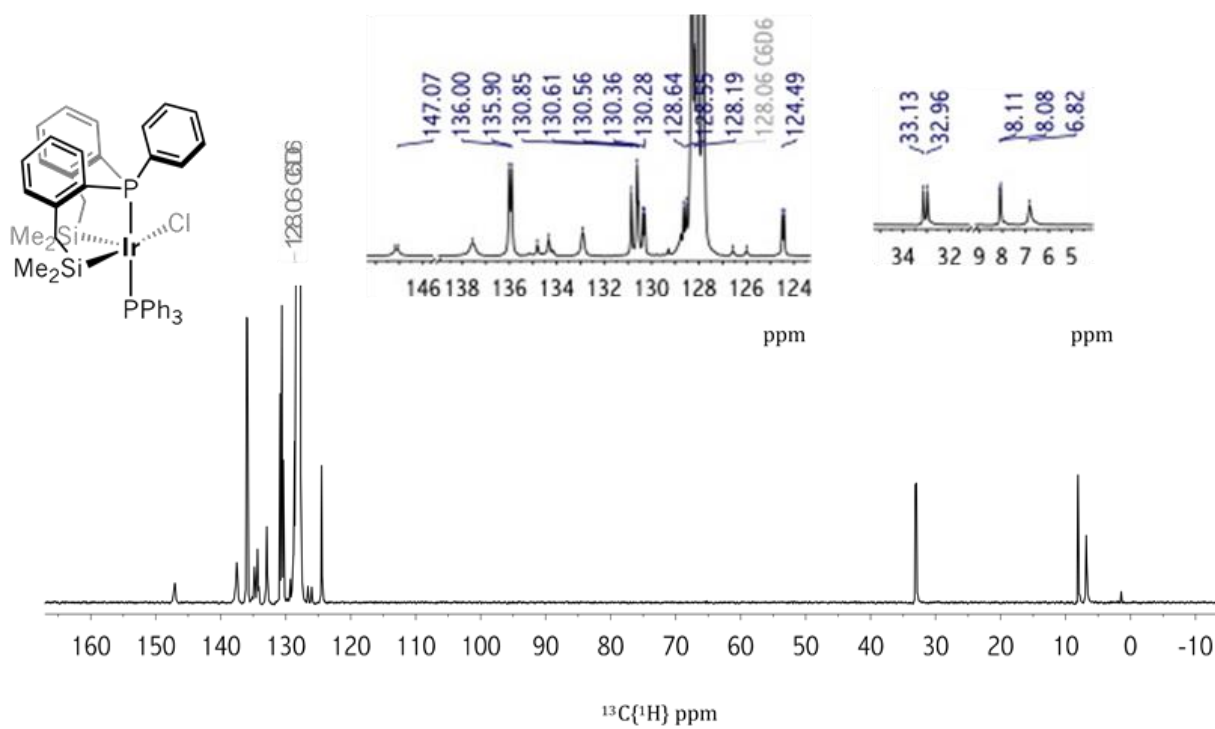

Figure S10.  $^{13}\text{C}\{^1\text{H}\}$  NMR spectrum (100.6 MHz, 298 K,  $\text{C}_6\text{D}_6$ ) of complex **3**.

### 1.3 Complex 4

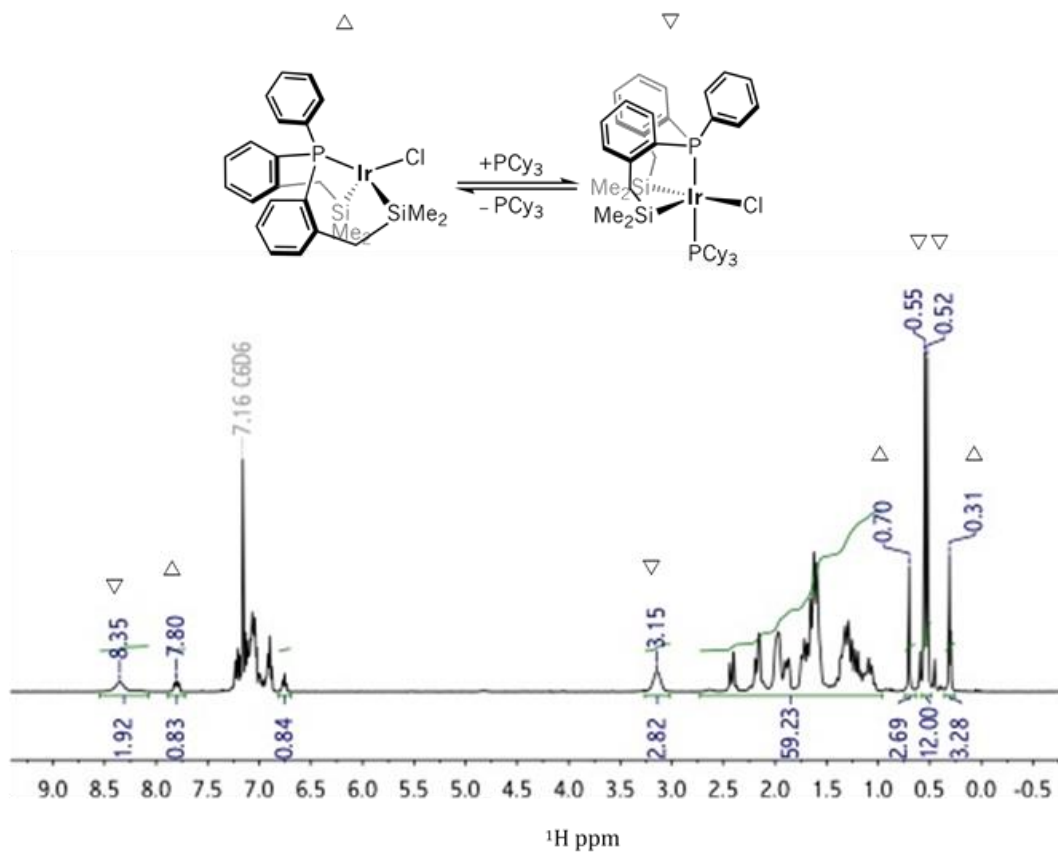

Figure S11. <sup>1</sup>H NMR spectrum (600 MHz, 298 K, C<sub>6</sub>D<sub>6</sub>) of the equilibrium mixture containing **1**' and **4**.

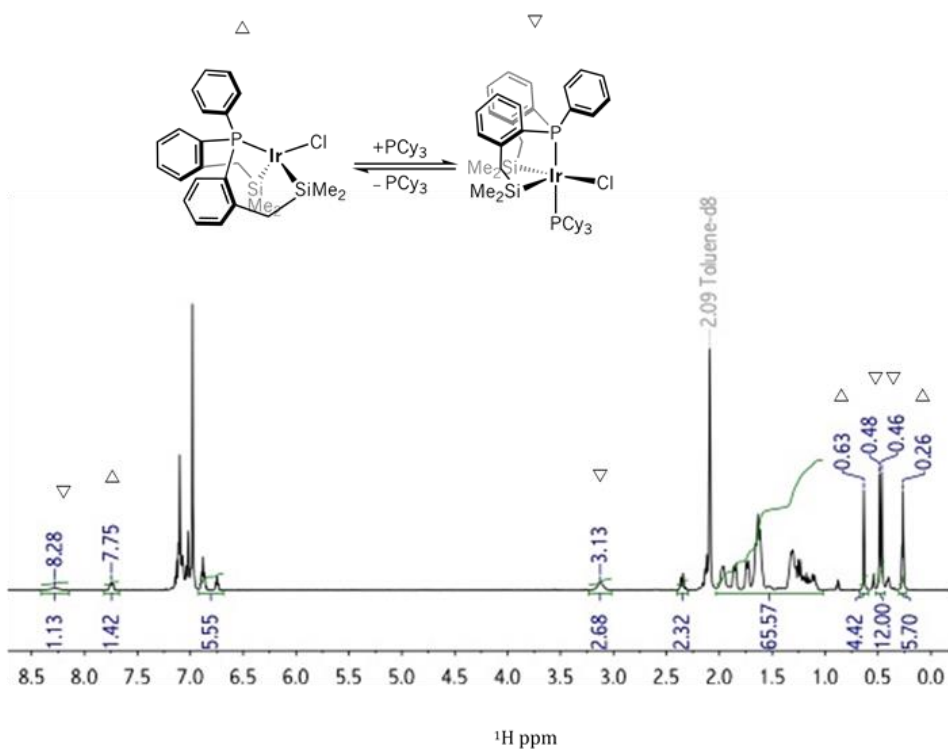

Figure S12. <sup>1</sup>H NMR spectrum (600 MHz, 298 K, tol-*d*<sub>8</sub>) of the equilibrium mixture containing **1**' and **4**.



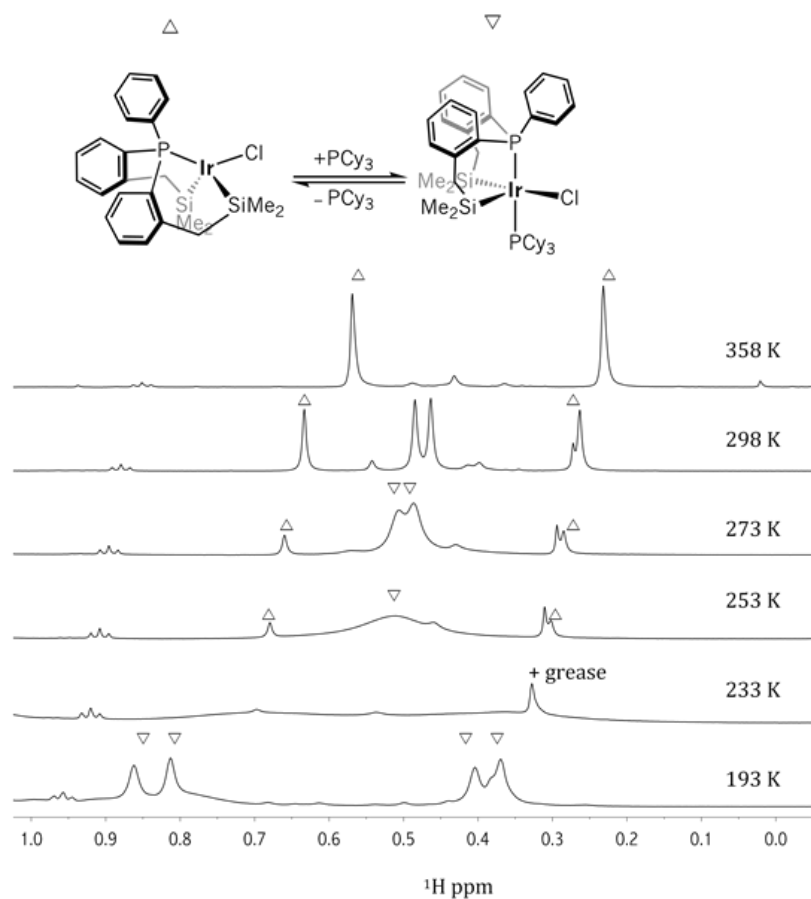

Figure S13.  $^1\text{H}$  NMR spectra (600 MHz,  $\text{tol-}d_8$ ) in the region of 0.0–1.0 ppm at different temperatures of the equilibrium mixture containing **1'** and **4**.

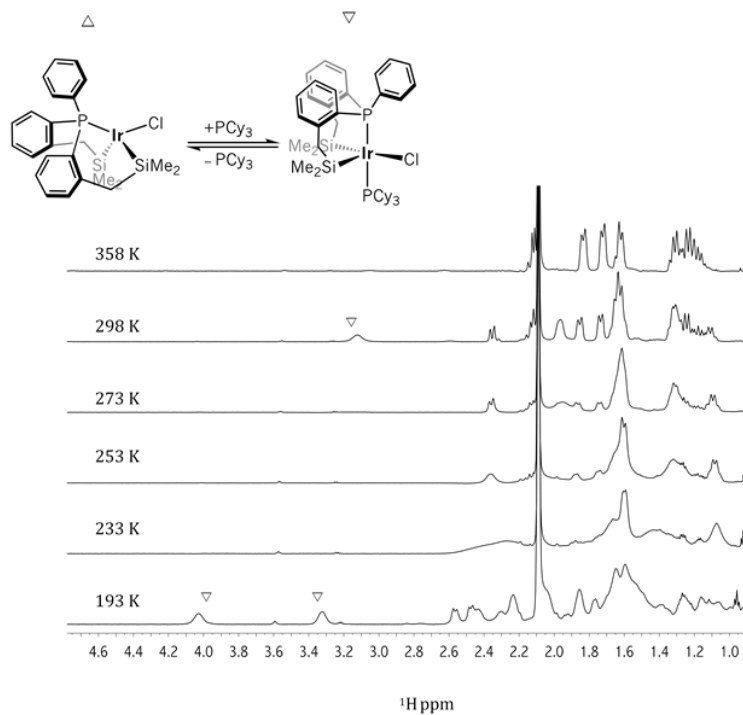

Figure S14.  $^1\text{H}$  NMR spectra (600 MHz,  $\text{tol-}d_8$ ) in the region of 1.0–4.6 ppm at different temperatures of the equilibrium mixture containing **1'** and **4**.

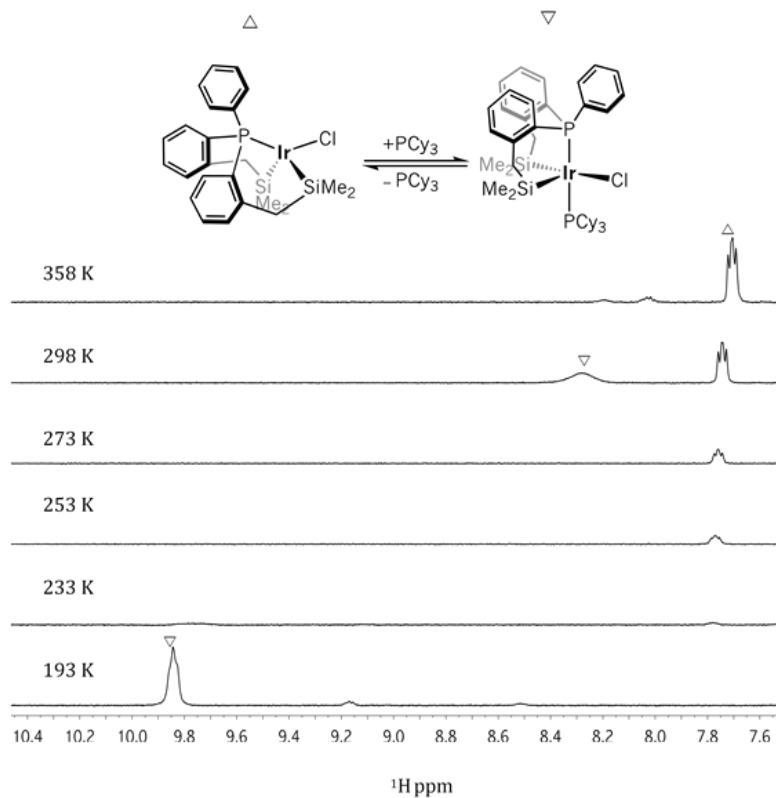

Figure S15.  $^1\text{H}$  NMR spectra (600 MHz,  $\text{tol-}d_8$ ) in the region of 7.6–10.4 ppm at different temperatures of the equilibrium mixture containing **1'** and **4**.

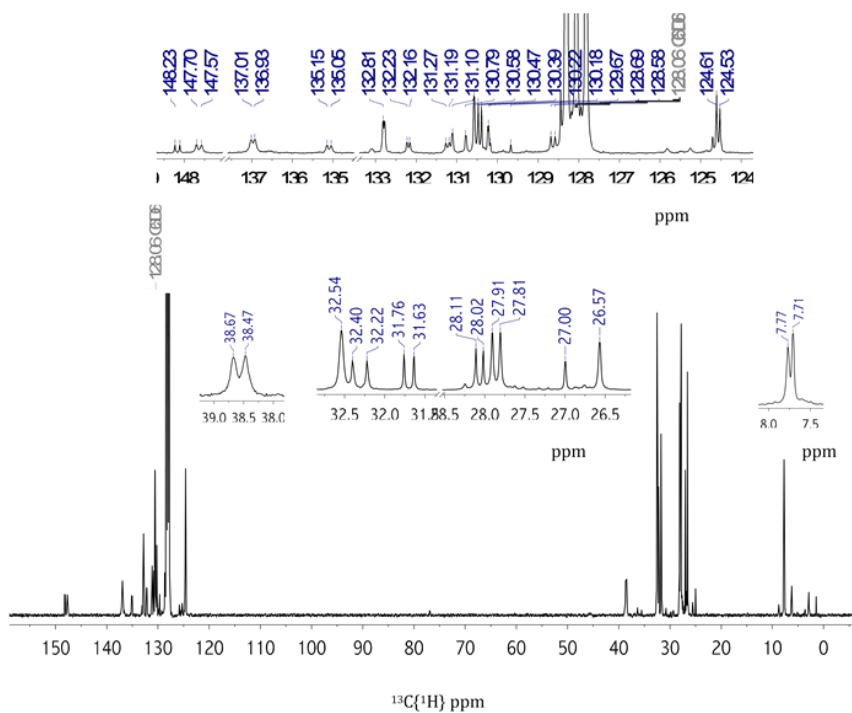

Figure S16.  $^{13}\text{C}\{^1\text{H}\}$  NMR spectrum (100.6 MHz, 298 K,  $\text{C}_6\text{D}_6$ ) of the equilibrium mixture containing **1'** and **4**.

### 1.3 Complexes 5a-d

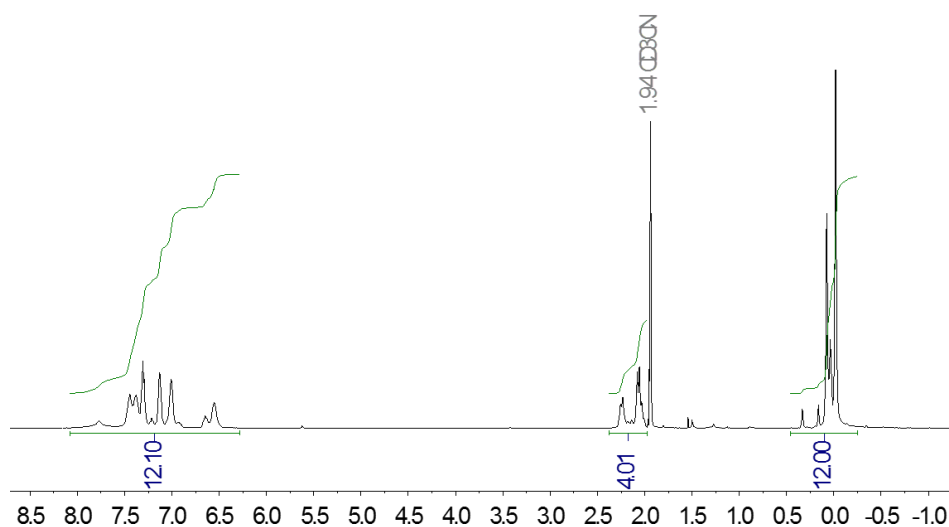

Figure S17.  $^1\text{H}$  NMR spectrum (500 MHz, 298 K,  $\text{CD}_3\text{CN}$ ) of the equilibrium mixture containing **5a-d**.

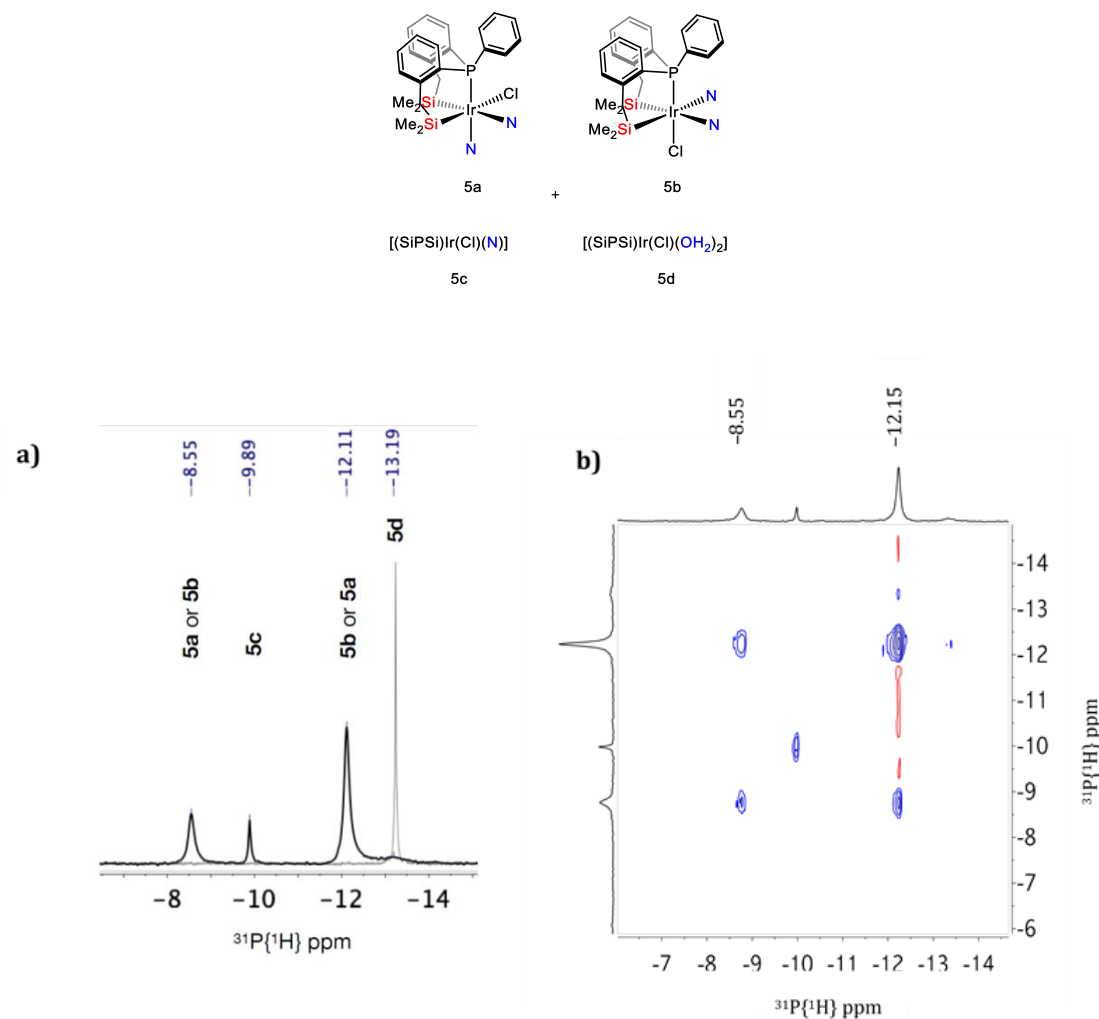

Figure S18. NMR spectra of the equilibrium mixture containing **5a-d** in  $\text{CD}_3\text{CN}$ : **a)**  $^{31}\text{P}\{^1\text{H}\}$  (161.9 MHz, 298 K) and in grey, same mixture after addition of an excess of water. **b)**  $^{31}\text{P}$ - $^{31}\text{P}$  EXSY ( $t_m = 150$  ms, 263 K).

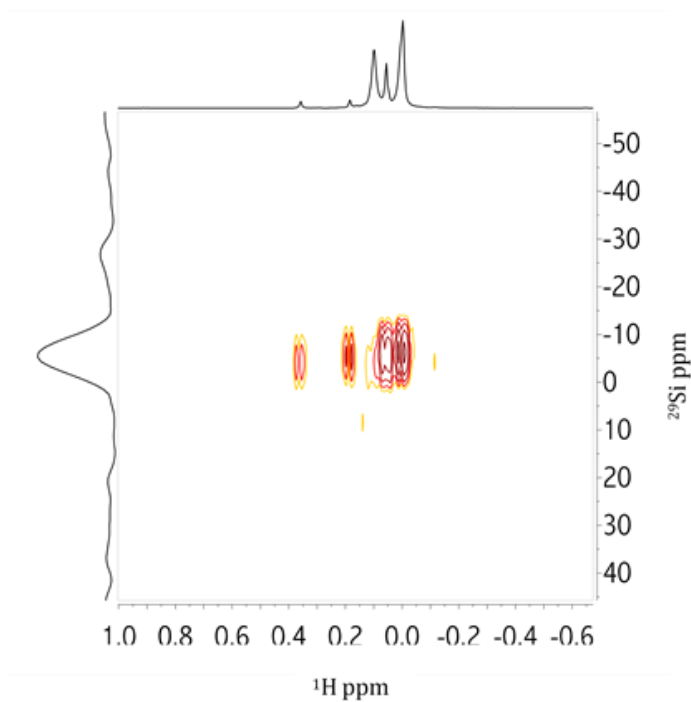

Figure S19.  $^1\text{H}$ - $^{29}\text{Si}$  HMQC NMR spectrum (298 K,  $\text{CD}_3\text{CN}$ ) of the equilibrium mixture containing **5a-d**.

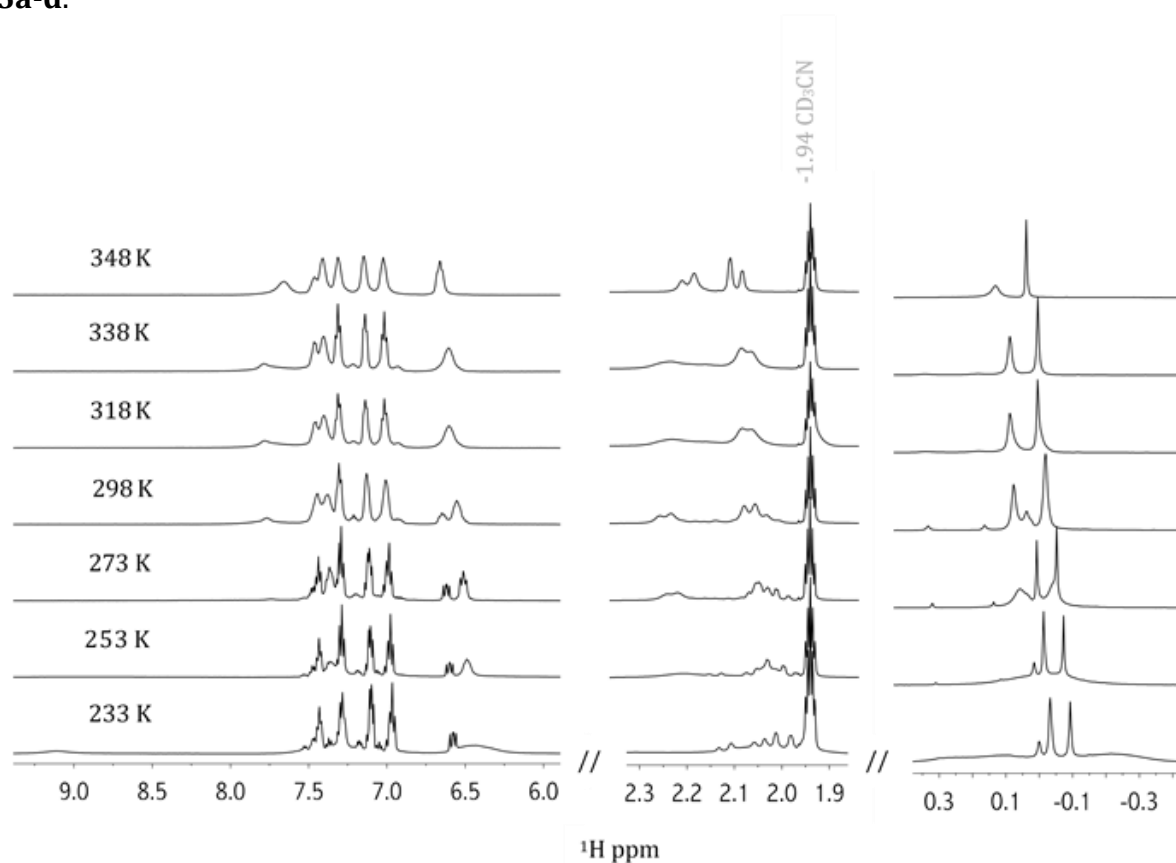

Figure S20.  $^1\text{H}$  NMR spectra (500 MHz) at different temperatures of the equilibrium mixture containing **5a-d** in  $\text{CD}_3\text{CN}$ .

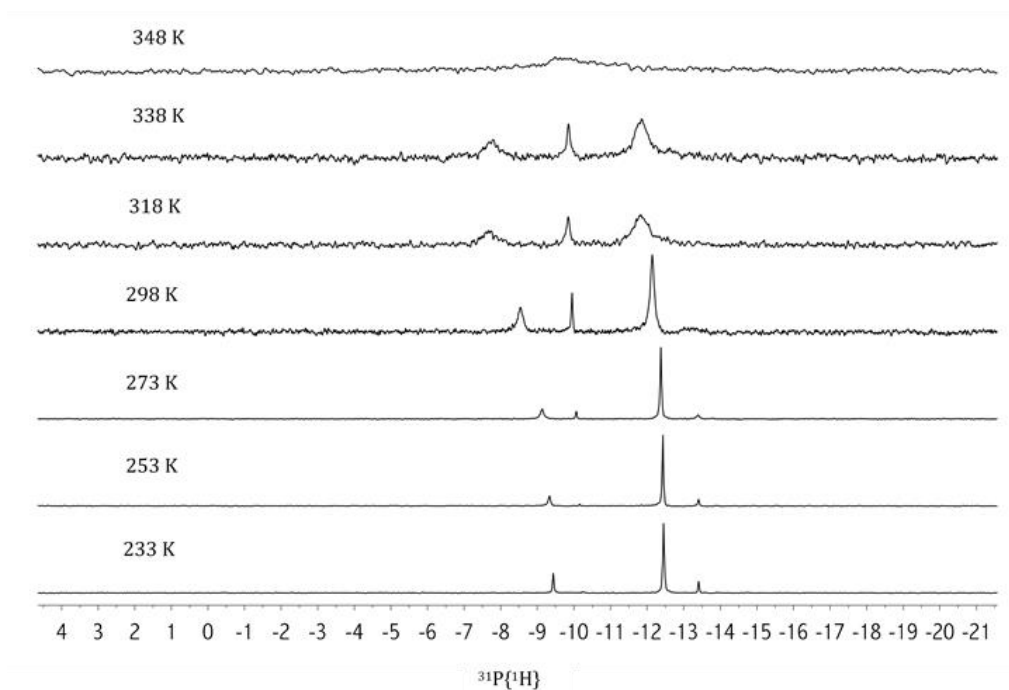

Figure S21.  $^{31}\text{P}\{^1\text{H}\}$  NMR spectrum (202.5 MHz) at different temperatures of the equilibrium mixture containing **5a-d** in  $\text{CD}_3\text{CN}$ .

#### 1.4 Complex 6b

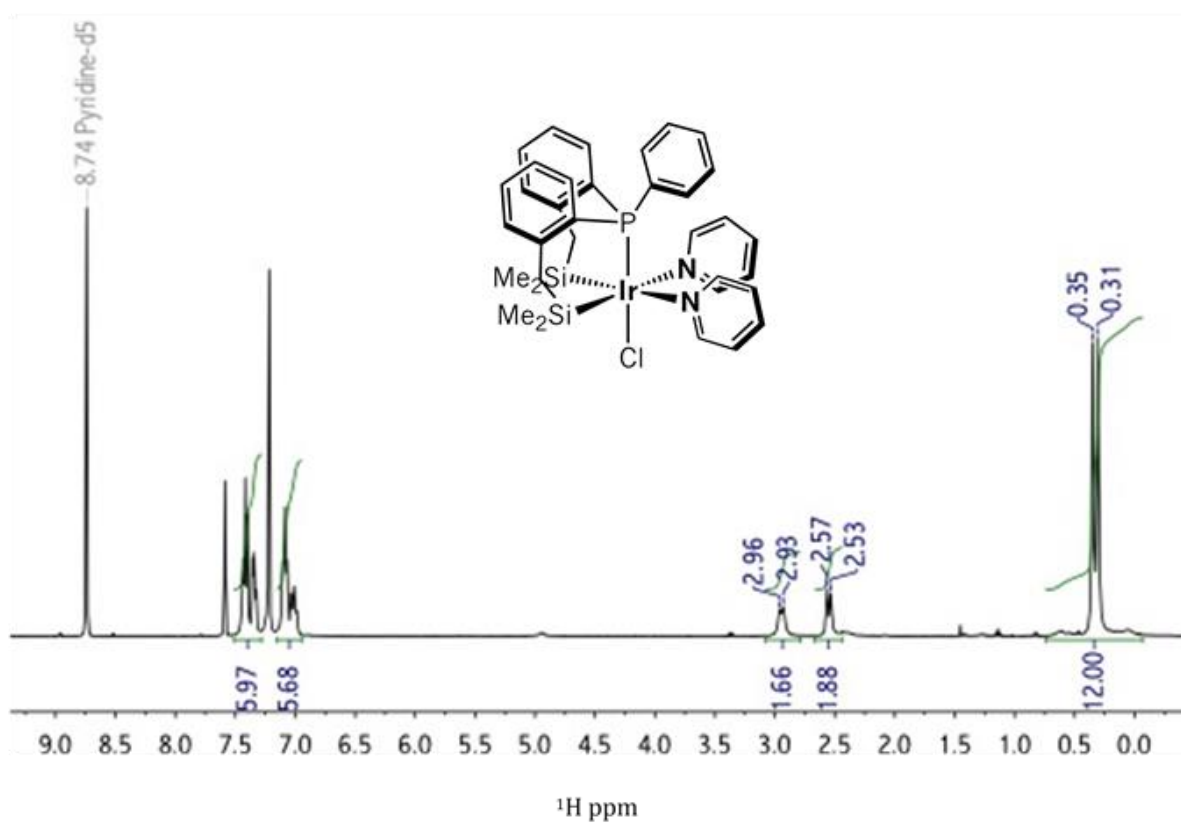

Figure S22.  $^1\text{H}$  NMR spectrum (400 MHz, 298 K,  $\text{pyr-d}_5$ ) of complex **6b**.

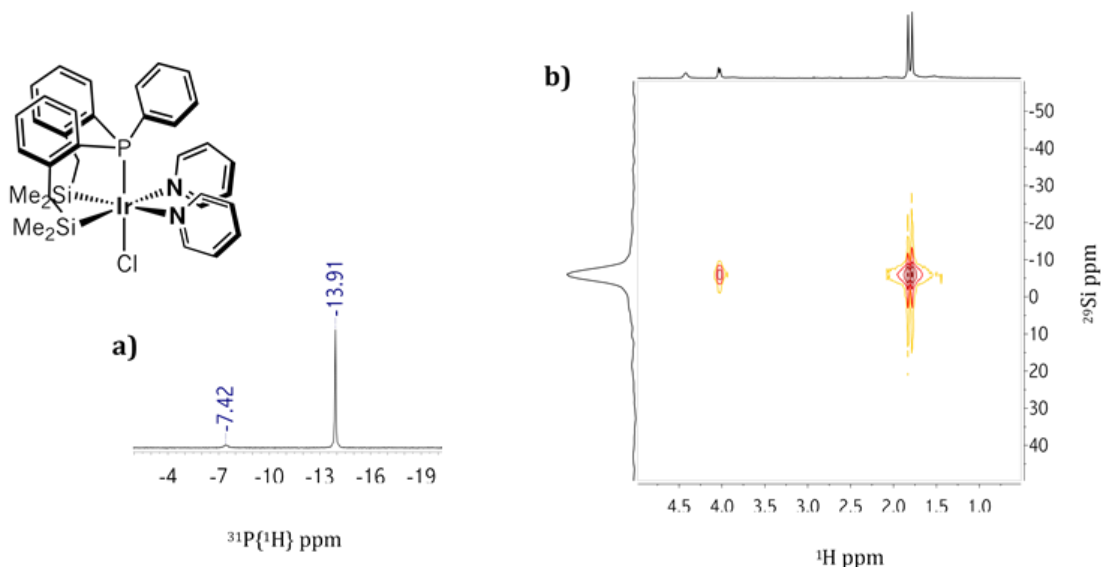

Figure S23. **a)**  $^{31}\text{P}\{^1\text{H}\}$  NMR (161.9 MHz) and **b)**  $^1\text{H}$ - $^{29}\text{Si}$  HMQC spectrums of complex **6b** in  $\text{pyr-d}_5$  at 298 K. Traces of isomer **6a** at -7.42 ppm.

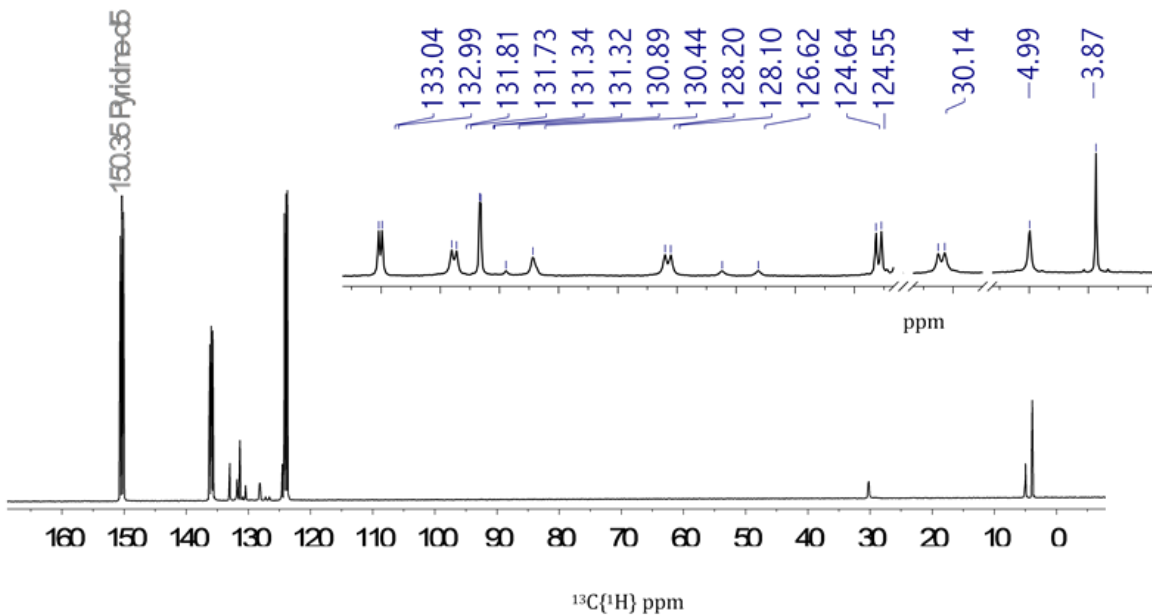

Figure S24.  $^{13}\text{C}\{^1\text{H}\}$  NMR spectrum (100.6 MHz, 298 K,  $\text{pyr-d}_5$ ) of complex **6b**.

### 1.4 Complex 7b

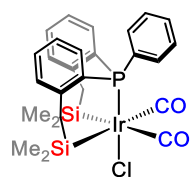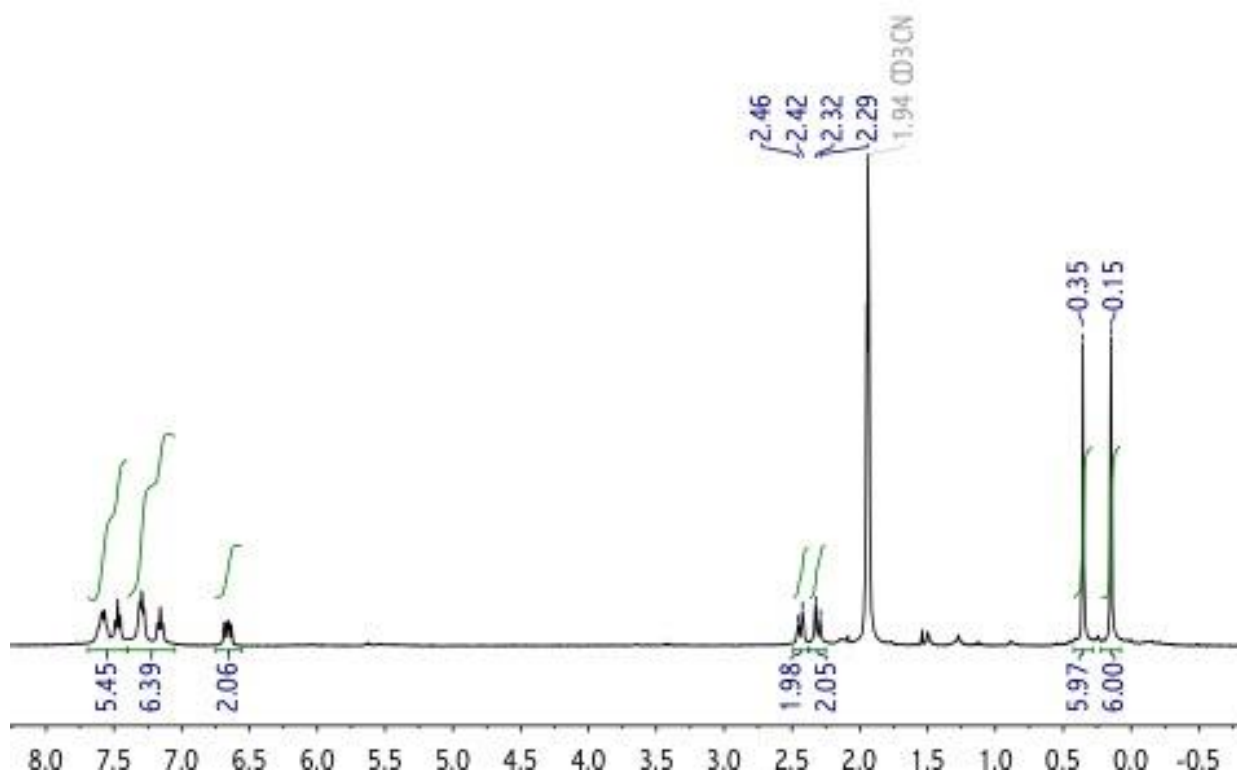

Figure S25. <sup>1</sup>H NMR spectrum (400 MHz, 298 K, CD<sub>3</sub>CN) of complex **7b**.

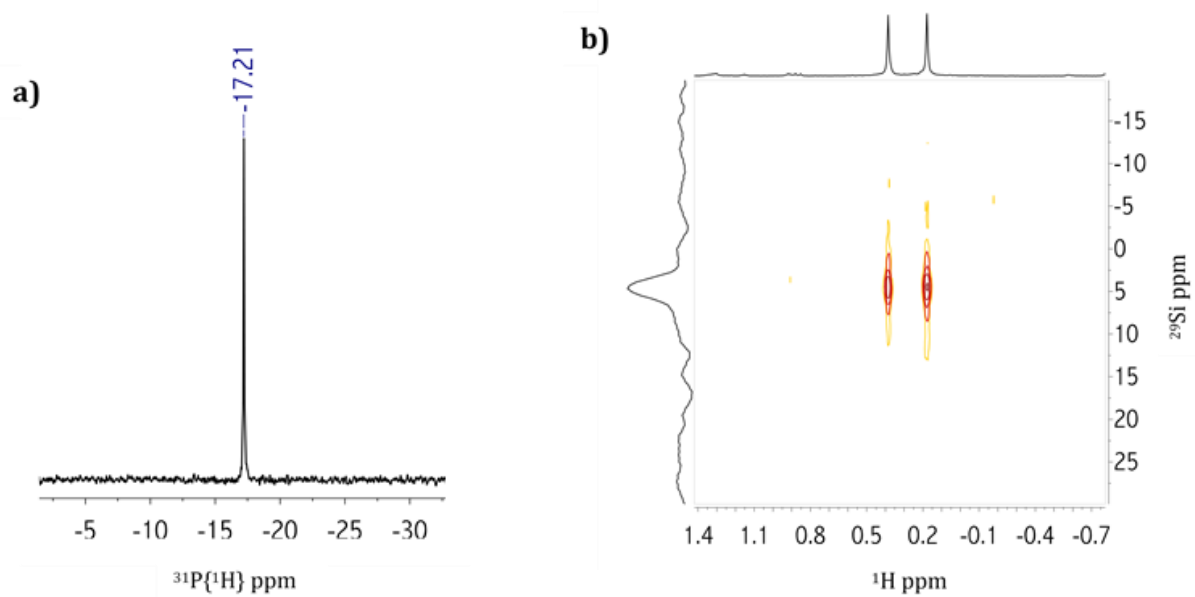

Figure S26. **a)** <sup>31</sup>P{<sup>1</sup>H} (161.9 MHz) and **b)** <sup>1</sup>H-<sup>29</sup>Si HMQC NMR spectra of complex **7b** at 298 K in CD<sub>3</sub>CN.

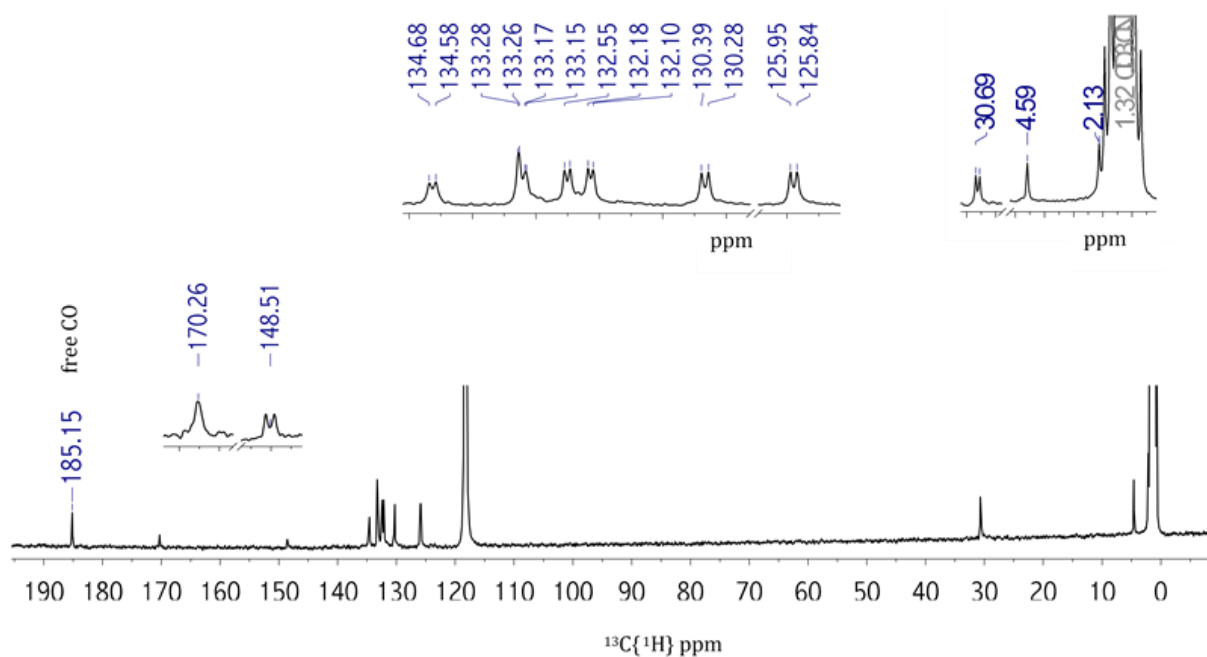

Figure S27. <sup>13</sup>C{<sup>1</sup>H} NMR spectrum (100.6 MHz, 298 K, CD<sub>3</sub>CN) of complex **7b**.

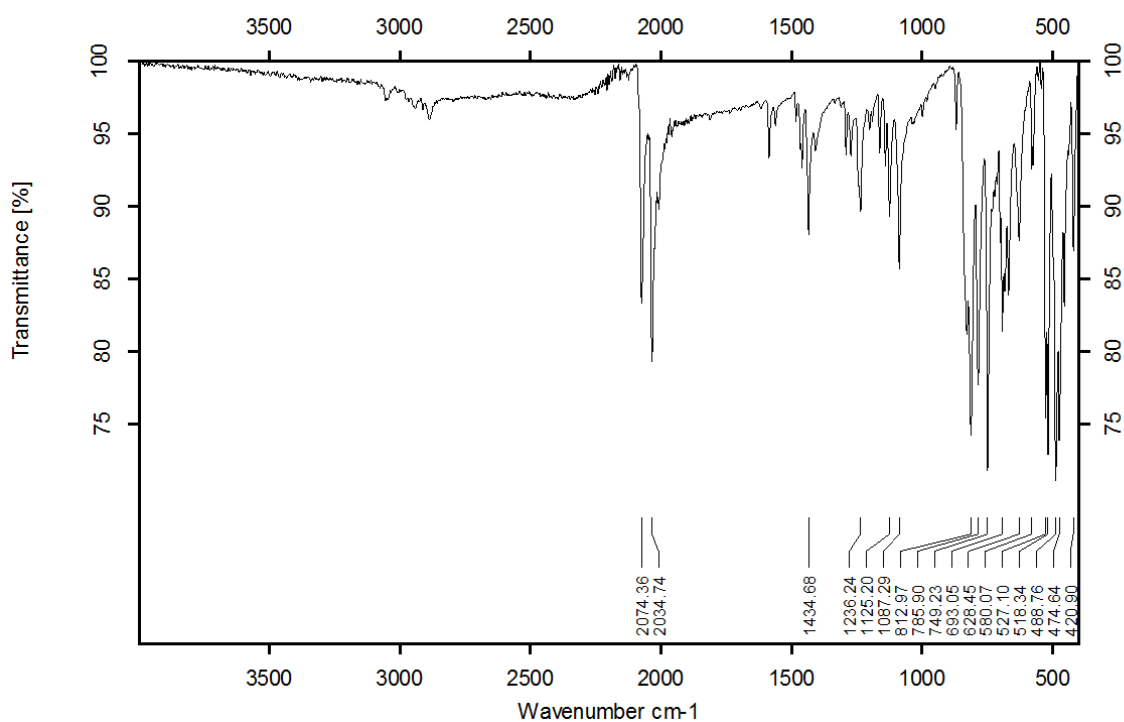

SAMPLE SCANS : 24  
 DATE : 21/03/2018  
 TIME : 13:48:59

SAMPLE : occ100  
 TECHNIQUE : Instrument type and / or accessory  
 US ER : Default

Figure S28. IR-ATR spectrum of complex **7b**.



### 1.5 Complexes 7a,b,c

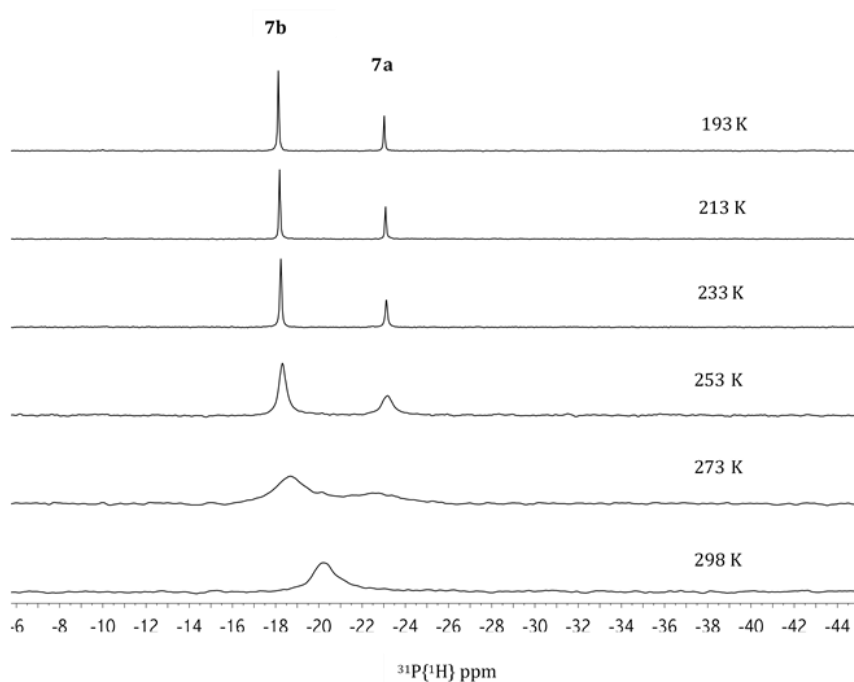

Figure S29.  $^{31}\text{P}\{^1\text{H}\}$  NMR spectra (202.5 MHz,  $\text{tol-}d_8$ ) at different temperatures corresponding to the equilibrium mixture of isomers **7b** and **7a**.

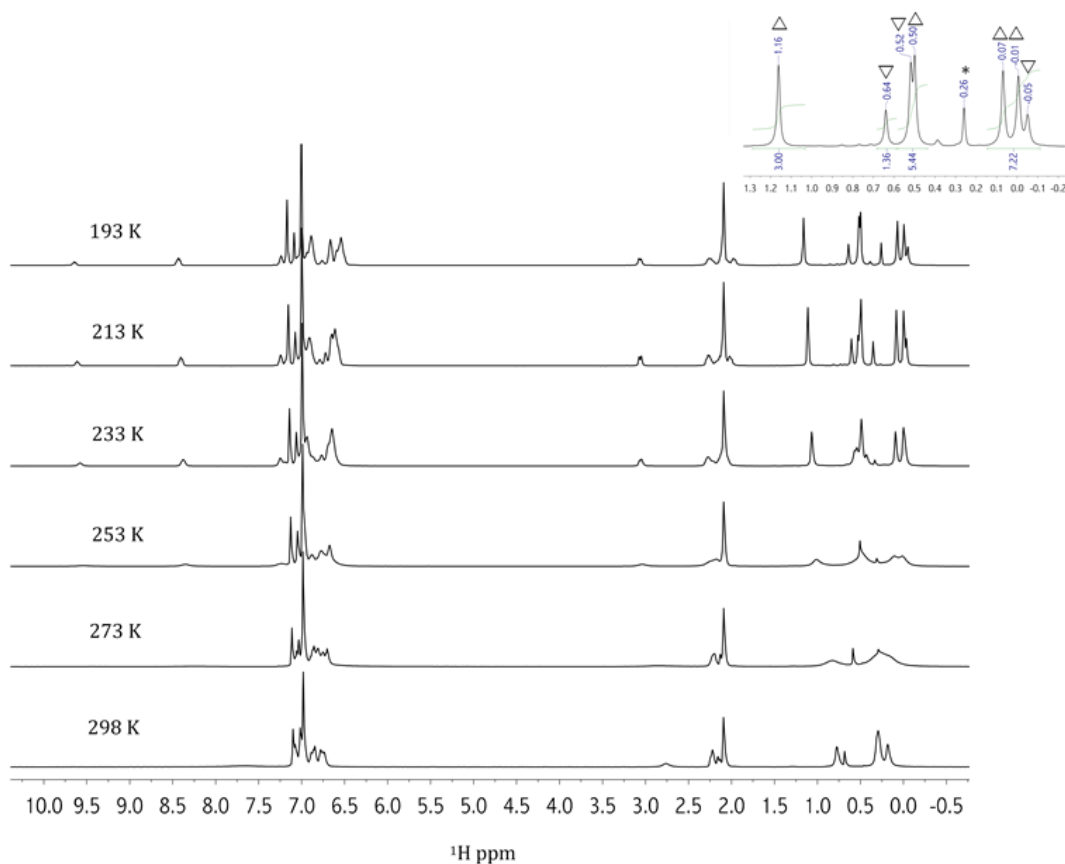

Figure S30.  $^1\text{H}$  NMR spectra (500 MHz,  $\text{tol-}d_8$ ) at different temperatures corresponding to the equilibrium mixture of isomers **7b**  $\triangle$  and **7a**  $\nabla$  and inlet of the region from  $-0.2$  ppm to  $1.3$  ppm at  $193$  K. \* grease.

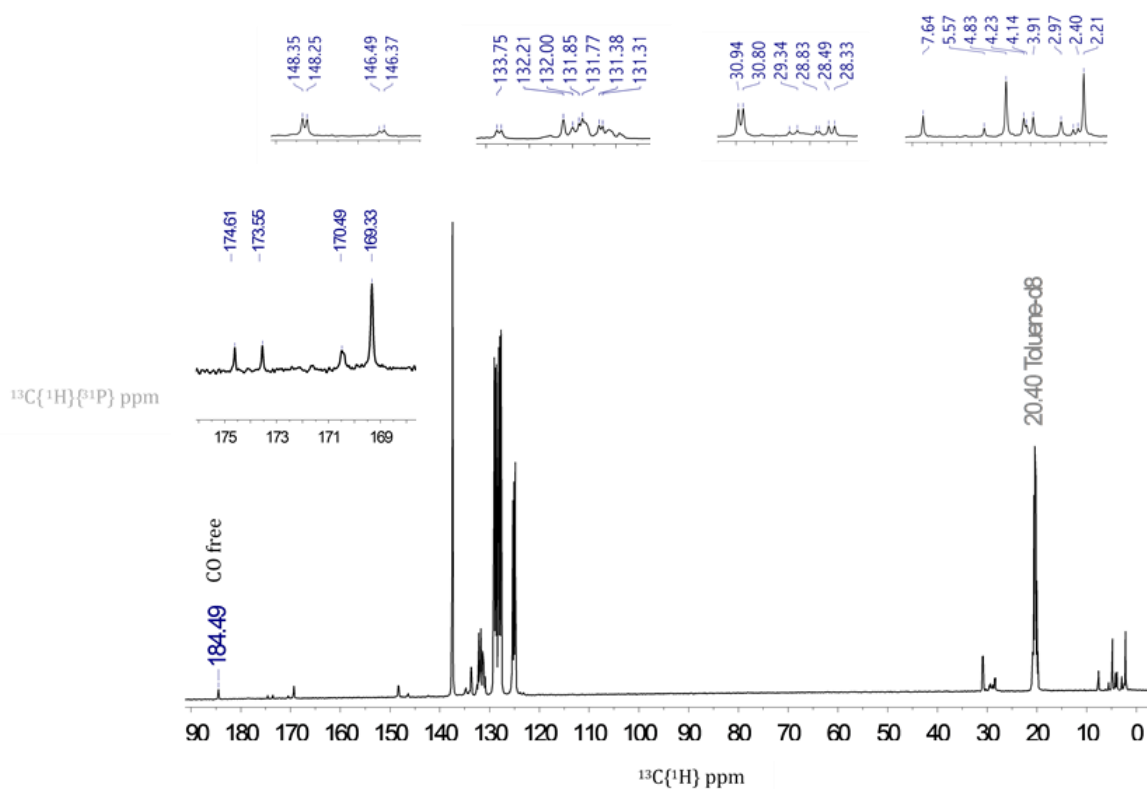

Figure S31.  $^{13}\text{C}\{^1\text{H}\}$  NMR spectrum (100.6 MHz, 298 K,  $\text{tol-}d_8$ ) corresponding to the equilibrium mixture of isomers **7b** and **7a**. Inlets of methyl, methylene, aromatic and CO regions.

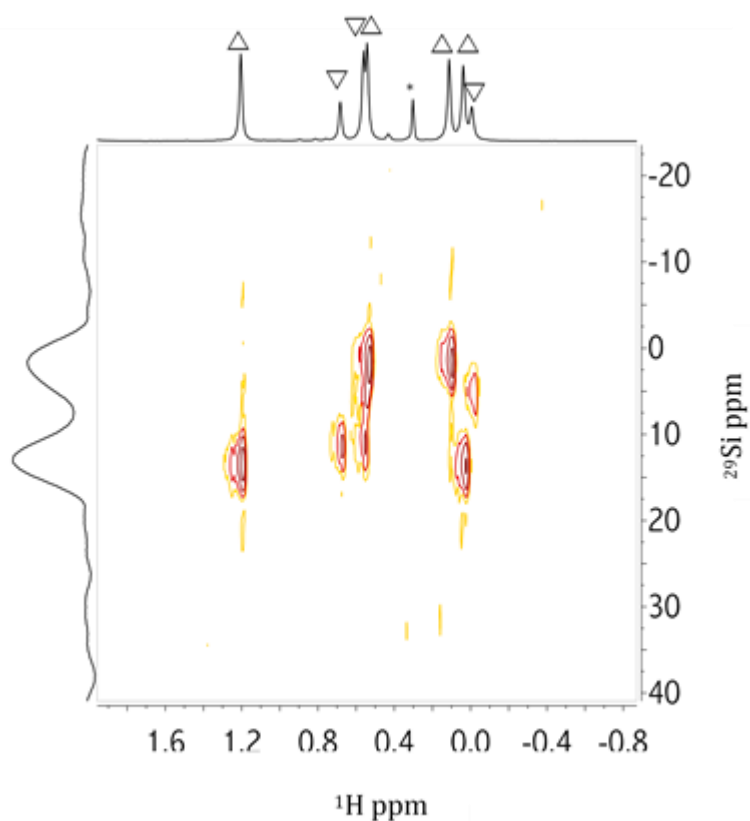

Figure S32.  $^1\text{H}$ - $^{29}\text{Si}$  HMQC NMR spectra of the equilibrium mixture of isomers **7b**  $\Delta$  and **7a**  $\nabla$  in  $\text{tol-}d_8$ .

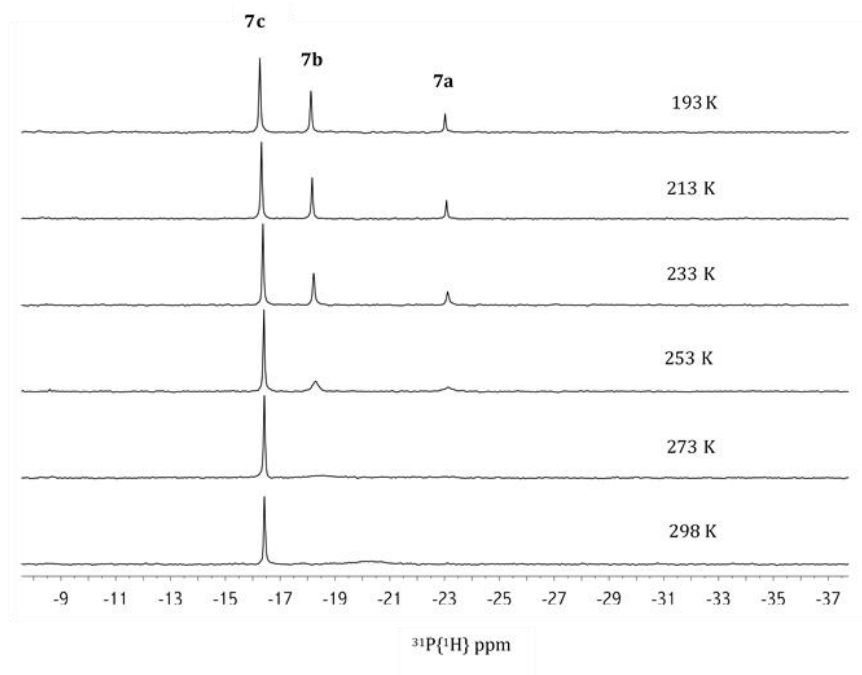

Figure S33.  $^{31}\text{P}\{^1\text{H}\}$  NMR spectra (202.5 MHz,  $\text{tol}-d_8$ ) at different temperatures of the reaction of **1** with 1 bar of CO leading to the NMR characterization of the monocarbonyl complex **7c**.

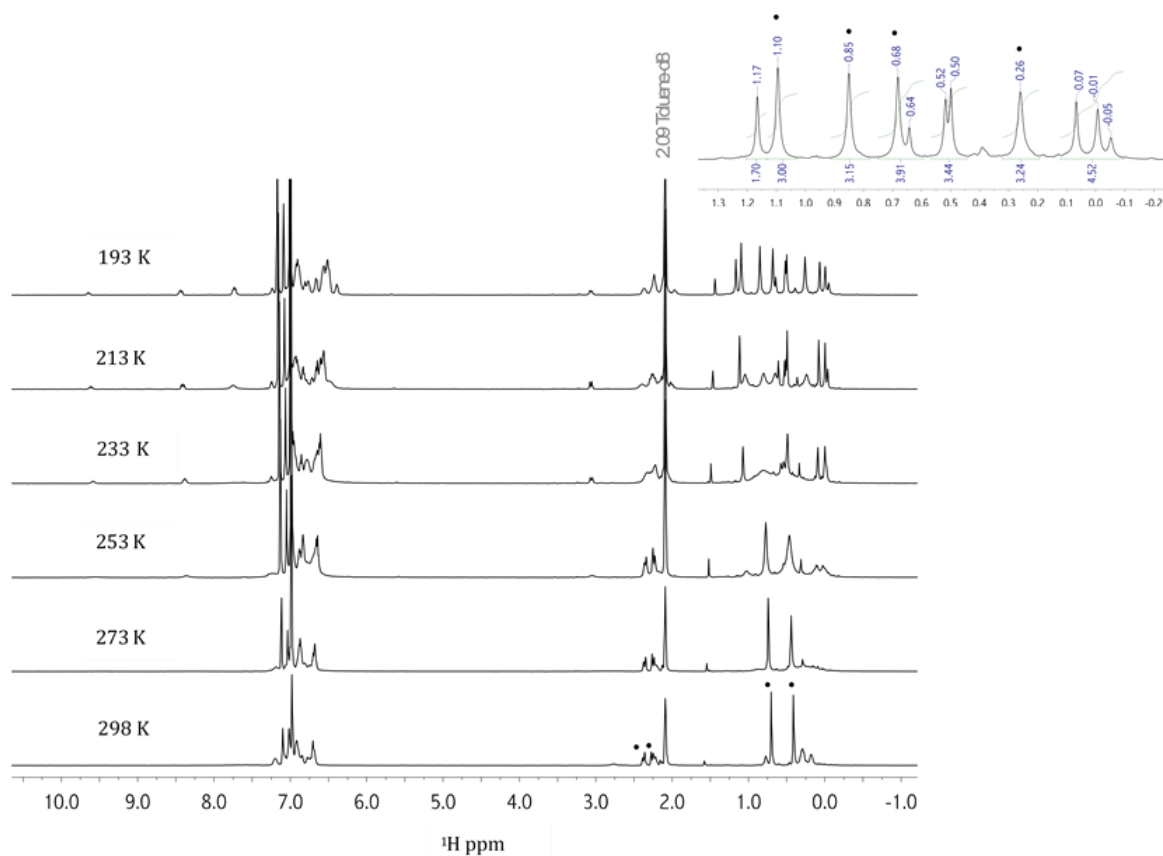

Figure S34.  $^1\text{H}$  NMR spectra (500 MHz,  $\text{tol}-d_8$ ) at different temperatures of the reaction of **1** with 1 bar of CO leading to the NMR characterization of the monocarbonyl complex **7c**. Inlet of the region from -0.2 ppm to 1.3 ppm at 193 K.

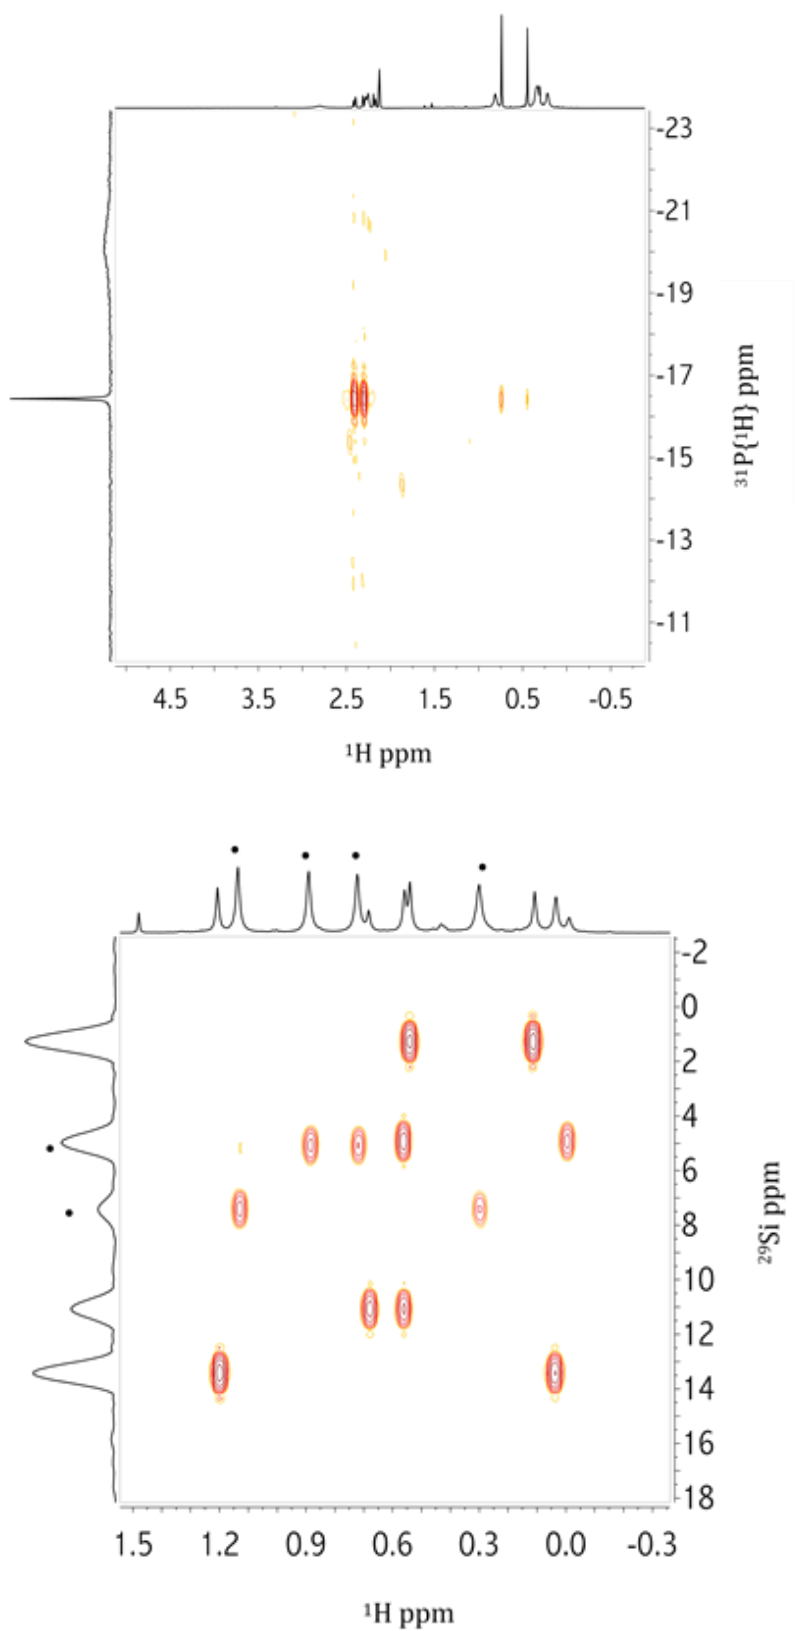

Figure S35. **(Top)**  $^1\text{H}$ - $^{31}\text{P}\{^1\text{H}\}$  HMQC and **(Bottom)**  $^1\text{H}$ - $^{29}\text{Si}$  HMQC NMR spectrums of the reaction of **1** with 1 bar of CO leading to the NMR characterization of the monocarbonyl complex **7c $\cdot$**  in  $\text{tol-}d_8$  at 298 and 193 K, respectively.

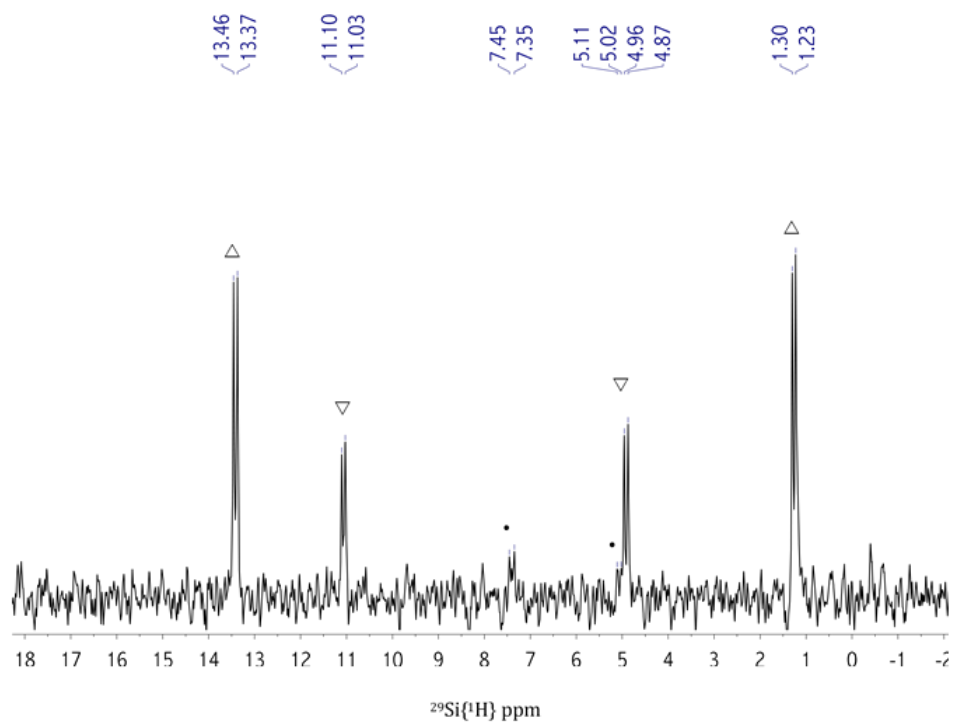

Figure S36.  $^{29}\text{Si}\{^1\text{H}\}$  DEPT NMR spectrum (119.2 MHz, 193 K,  $\text{tol}-d_8$ ) of the reaction of **1** with 1 bar of CO leading to the NMR characterization of the monocarbonyl complex **7c** $\bullet$  and the equilibrium mixture of isomers **7b** $\Delta$  and **7a** $\nabla$ .

#### 1.6 Complex 8

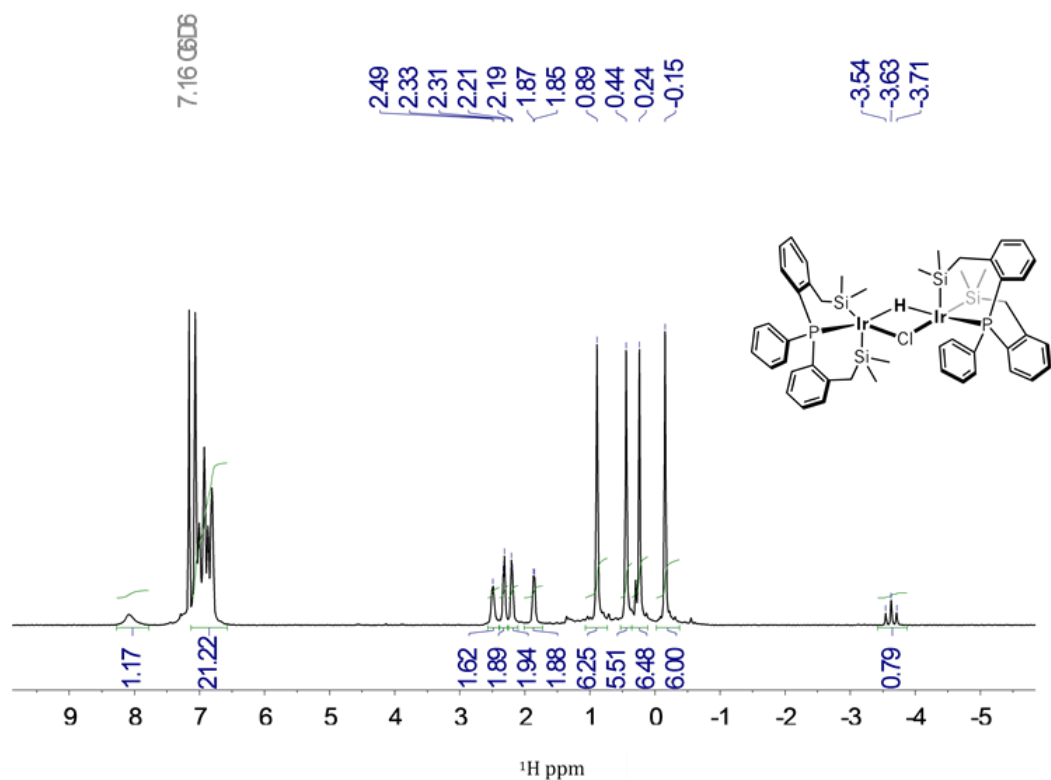

Figure S37.  $^1\text{H}$  NMR spectrum (600 MHz, 298 K,  $\text{C}_6\text{D}_6$ ) of complex **8**.

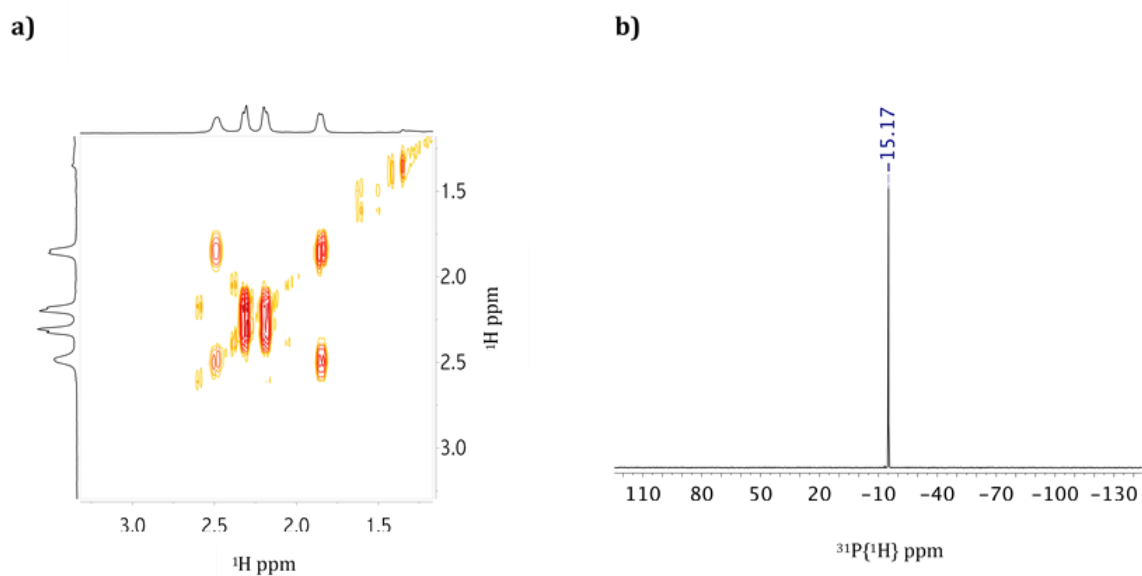

Figure S38. **a)**  $^1\text{H}$ - $^1\text{H}$  COSY in the region of 1.0 to 3.5 ppm and **b)**  $^{31}\text{P}\{^1\text{H}\}$  NMR spectrum (243 MHz) of complex **8** in  $\text{C}_6\text{D}_6$  at 298 K.

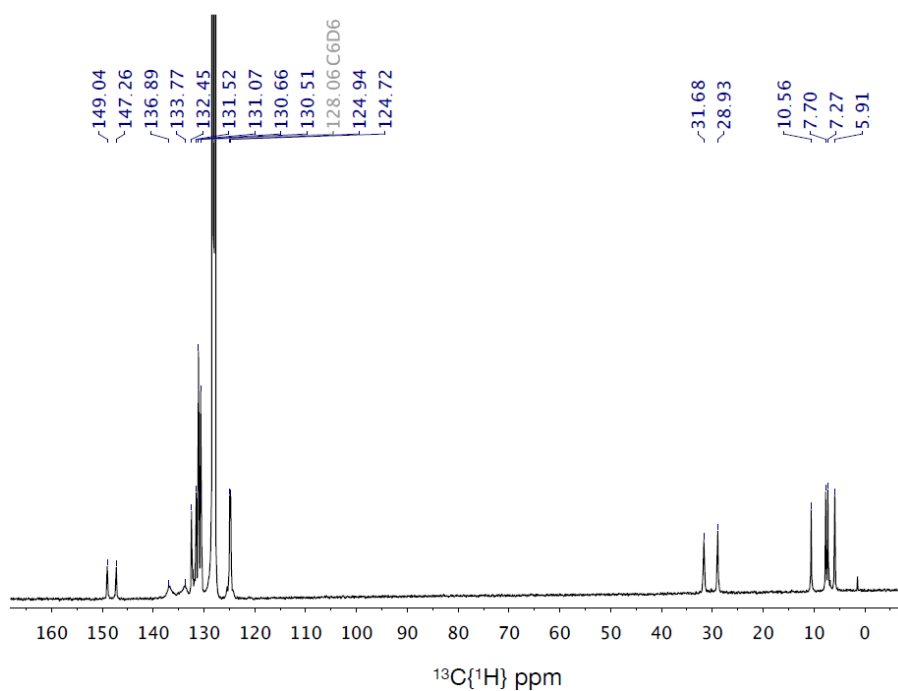

Figure S39.  $^{13}\text{C}\{^1\text{H}\}$  NMR spectrum (100.6 MHz, 298 K,  $\text{C}_6\text{D}_6$ ) of complex **8**.

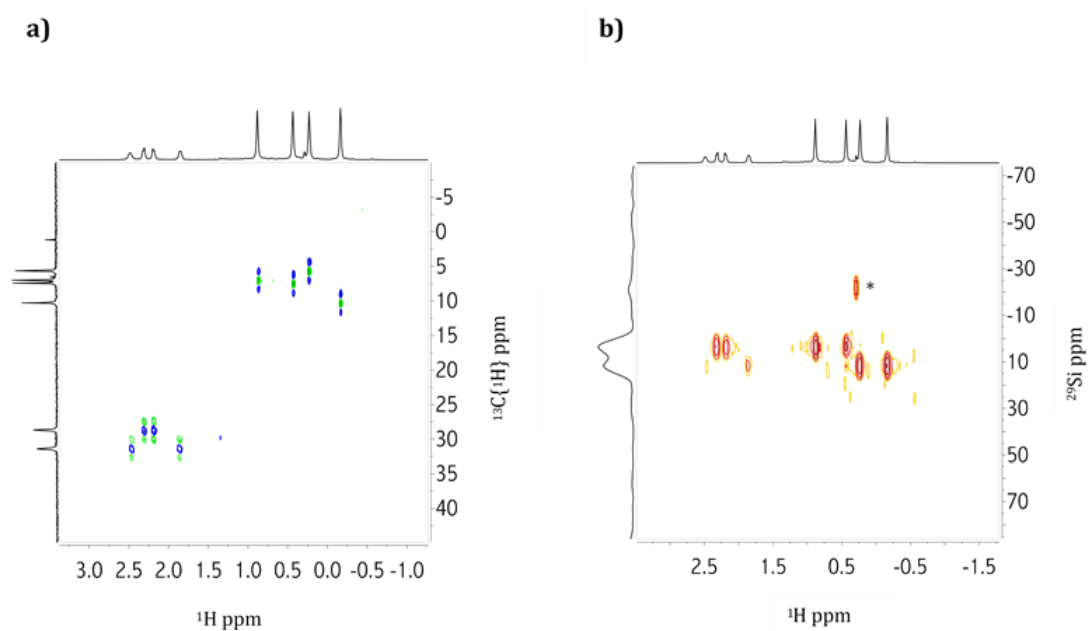

Figure S40. **a)**  $^1\text{H}$ - $^{13}\text{C}\{^1\text{H}\}$  HSQC of methyl and methylene region and **b)**  $^1\text{H}$ - $^{29}\text{Si}$  HMQC NMR spectra of complex **8** in  $\text{C}_6\text{D}_6$  at 298 K. \* grease.

### 1.7 Complex 9

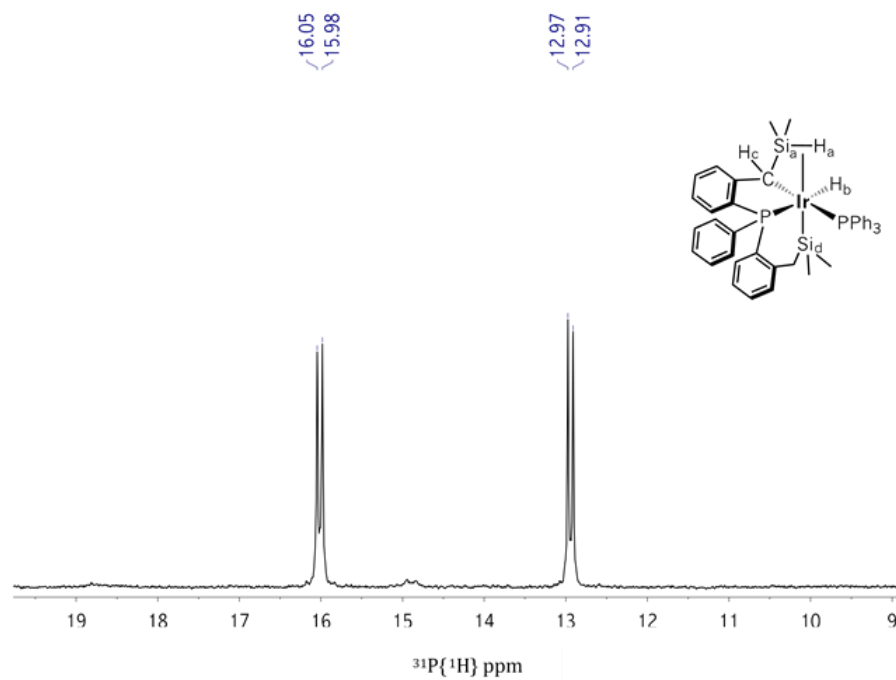

Figure S41.  $^{31}\text{P}\{^1\text{H}\}$  NMR spectrum (161.9 MHz) of the reaction of **3** with  $\text{LiBHET}_3$  in  $\text{C}_6\text{D}_6$  at 298 K leading to the NMR characterization of complex **9**.

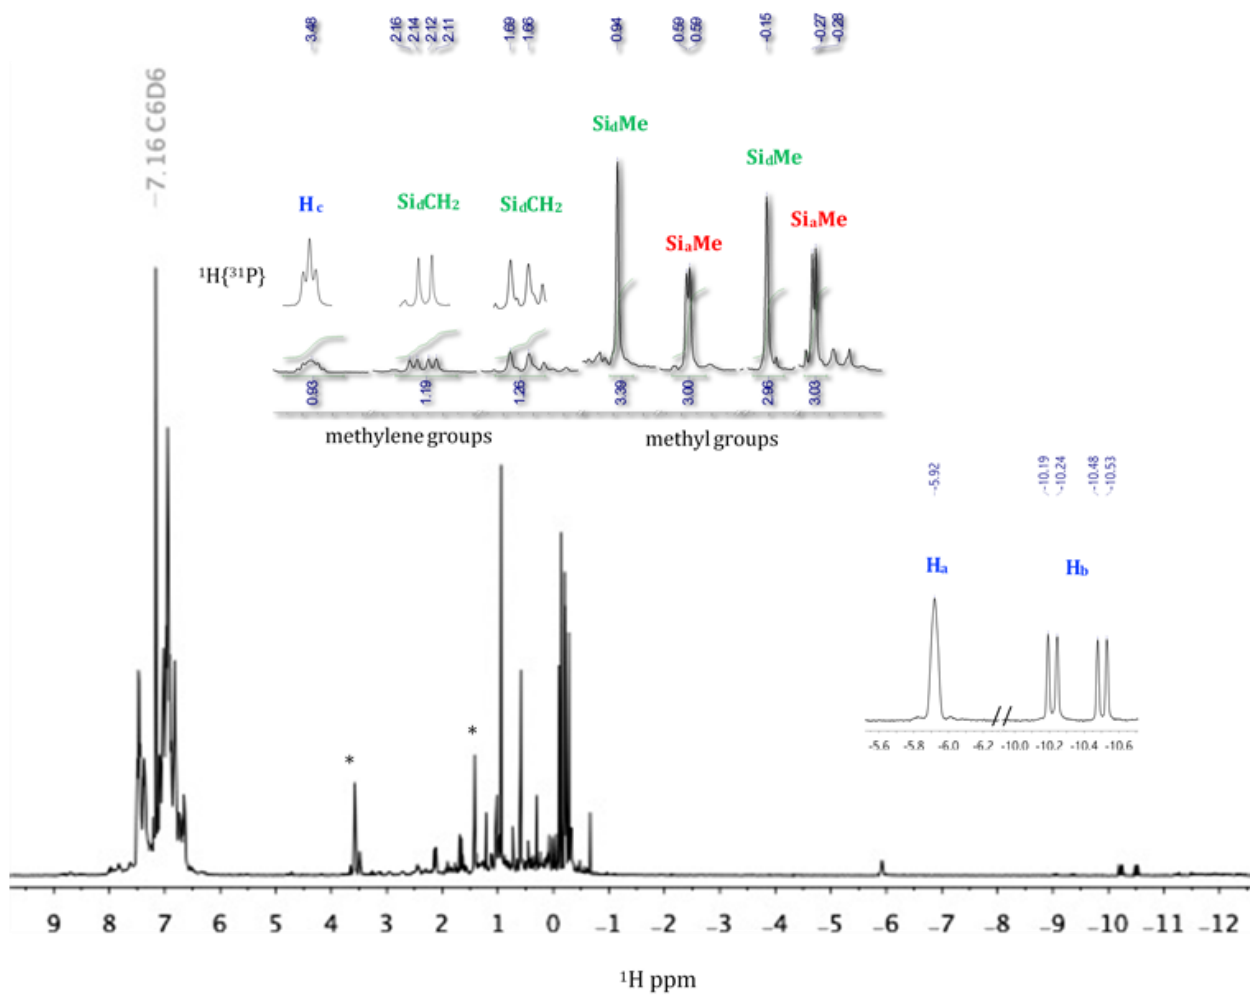

Figure S42.  $^1\text{H}$  NMR spectrum (400 MHz) of the reaction of **3** with  $\text{LiBHET}_3$  in  $\text{C}_6\text{D}_6$  at 298 K leading to the NMR characterization of complex **9**. \* THF



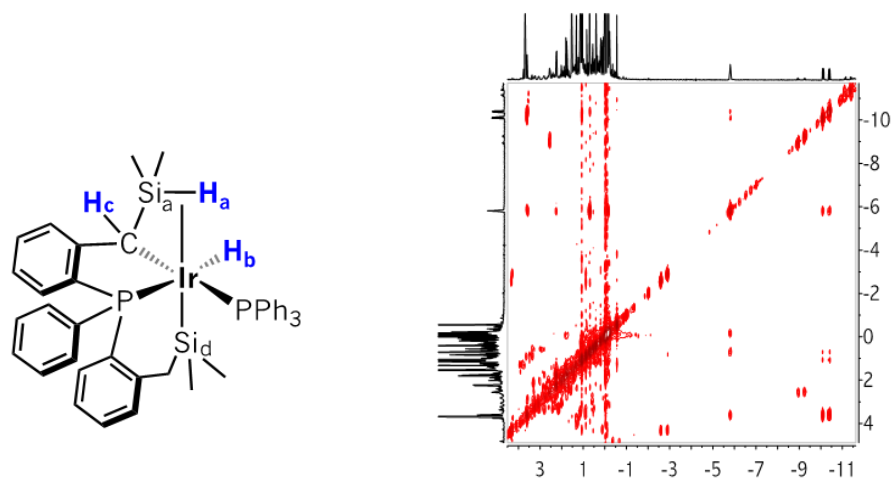

Figure S43.  $^1\text{H}$ - $^1\text{H}$  COSY NMR spectrum of the reaction of **3** with  $\text{LiBHET}_3$  in  $\text{C}_6\text{D}_6$  at 298 K leading to the NMR characterization of complex **9**.

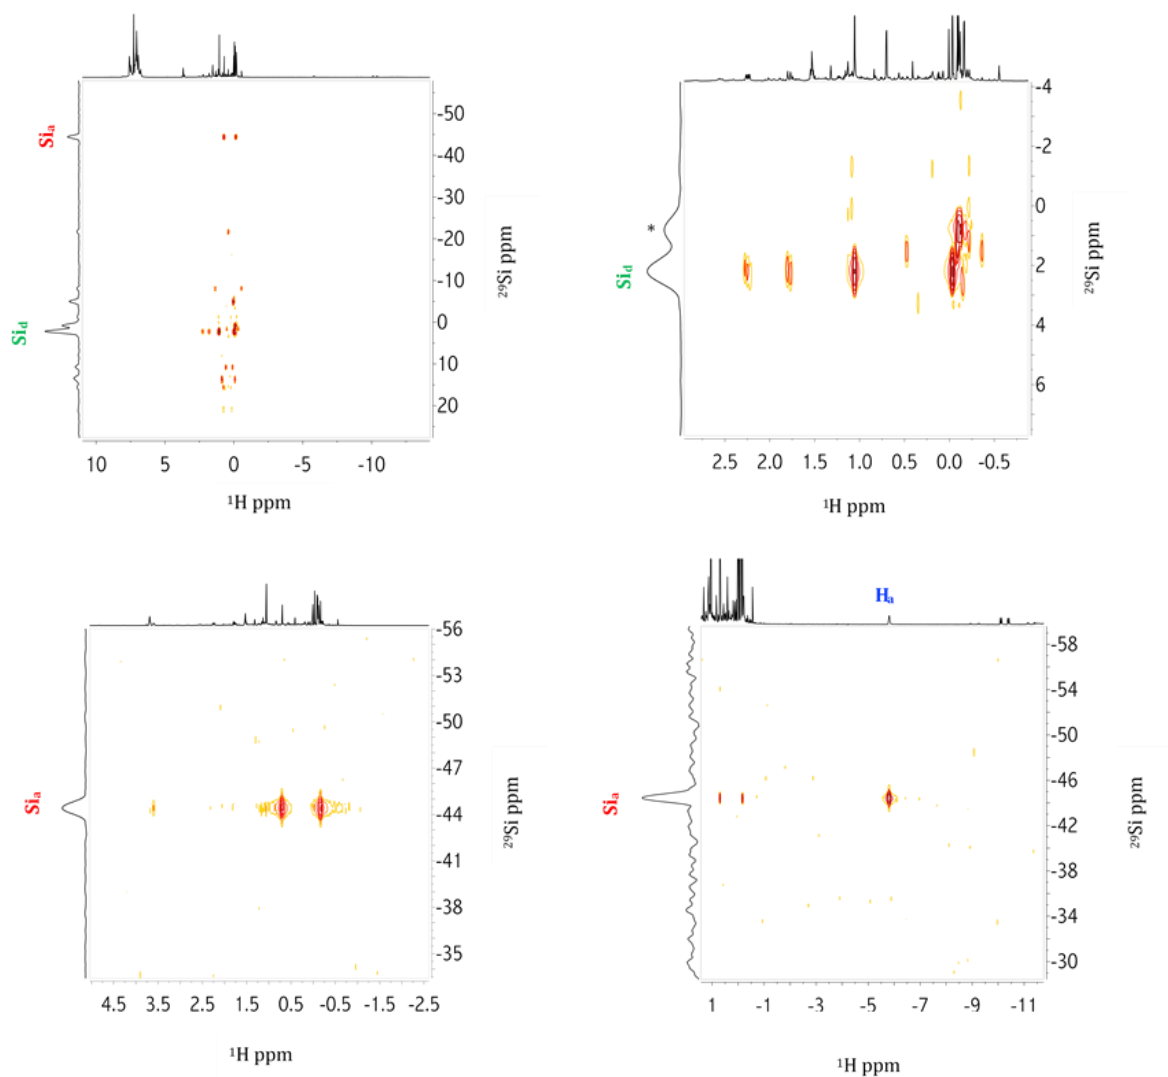

Figure S44.  $^1\text{H}$ - $^{29}\text{Si}$  HMQC NMR spectra of the reaction of **3** with  $\text{LiBHET}_3$  in  $\text{C}_6\text{D}_6$  at 298 K leading to the NMR characterization of complex **9**. \* grease

## 2. X-ray Data

X-ray data for complex 1

|                                     |                                                         |
|-------------------------------------|---------------------------------------------------------|
| $C_{48}H_{58}Cl_2Ir_2P_2Si_4C_6H_6$ | $F(000) = 662$                                          |
| $M_r = 1342.65$                     |                                                         |
| Triclinic, P -1                     | $D_x = 1.643 \text{ Mg m}^{-3}$                         |
| Hall symbol: -P 1                   |                                                         |
| $a = 10.4849 (8) \text{ \AA}$       | Mo $K\alpha$ radiation, $\lambda = 0.71073 \text{ \AA}$ |
| $b = 11.5765 (9) \text{ \AA}$       | Cell parameters from 9827 reflections                   |
| $c = 12.4188 (9) \text{ \AA}$       | $\theta = 2.5\text{--}26.5^\circ$                       |
| $\alpha = 68.798 (2)^\circ$         | $\mu = 5.18 \text{ mm}^{-1}$                            |
| $\beta = 78.844 (2)^\circ$          | $T = 100 \text{ K}$                                     |
| $\gamma = 76.585 (3)^\circ$         | Plate, yellow                                           |
| $V = 1356.98 (18) \text{ \AA}^3$    | $0.15 \times 0.1 \times 0.02 \text{ mm}$                |
| $Z = 1$                             |                                                         |

|                                                                                        |                                                                        |
|----------------------------------------------------------------------------------------|------------------------------------------------------------------------|
| Bruker Kappa APEX II diffractometer                                                    | 5046 reflections with $I > 2\sigma(I)$                                 |
| Radiation source: micro-source                                                         | $R_{\text{int}} = 0.039$                                               |
| Graphite monochromator                                                                 | $\theta_{\text{max}} = 26.4^\circ$ , $\theta_{\text{min}} = 2.0^\circ$ |
| $\omega$ - $\phi$ scans                                                                | $h = -13 \text{ } 13$                                                  |
| Absorption correction: multi-scan [c.f. r.h. blessing, acta cryst. (1995), a51, 33-38] | $k = -11 \text{ } 14$                                                  |
| $T_{\text{min}} = 0.529$ , $T_{\text{max}} = 0.754$                                    | $l = -15 \text{ } 15$                                                  |
| 27827 measured reflections                                                             | Standard reflections: 0                                                |
| 5538 independent reflections                                                           |                                                                        |

|                                 |                                                                       |
|---------------------------------|-----------------------------------------------------------------------|
| Refinement on $F^2$             |                                                                       |
| Least-squares matrix: full      | Hydrogen site location: <u>inferred from neighbouring sites</u>       |
| $R[F^2 > 2\sigma(F^2)] = 0.020$ | <u>H-atom parameters constrained</u>                                  |
| $wR(F^2) = 0.044$               | $w = 1/[\sigma^2(F_o^2) + 1.9163P]$<br>where $P = (F_o^2 + 2F_c^2)/3$ |
| $S = 1.08$                      | $(\Delta/\sigma)_{\text{max}} = 0.001$                                |
| 5538 reflections                | $\Delta\rho_{\text{max}} = 0.93 \text{ e \AA}^{-3}$                   |

|                       |                                                        |
|-----------------------|--------------------------------------------------------|
| <u>293</u> parameters | $\Delta\rho_{\min} = -1.11 \text{ e } \text{\AA}^{-3}$ |
| <u>0</u> restraints   | Extinction correction: <u>none</u>                     |

### X-ray data for complex 2

|                                                                                                  |                                                                                      |
|--------------------------------------------------------------------------------------------------|--------------------------------------------------------------------------------------|
| $M_r = 1036.67$                                                                                  | $D_x = 1.512 \text{ Mg m}^{-3}$                                                      |
| <u>Monoclinic, <math>P2_1/c</math></u>                                                           |                                                                                      |
| Hall symbol: <u>-P 2ybc</u>                                                                      | <u>Mo <math>K\alpha</math> radiation, <math>\lambda = 0.71073 \text{ \AA}</math></u> |
| $a = 10.171 (3) \text{ \AA}$                                                                     | Cell parameters from <u>9831</u> reflections                                         |
| $b = 15.591 (5) \text{ \AA}$                                                                     | $\theta = 2.3\text{--}30.5^\circ$                                                    |
| $c = 28.733 (9) \text{ \AA}$                                                                     | $\mu = 3.19 \text{ mm}^{-1}$                                                         |
| $\beta = 92.251 (8)^\circ$                                                                       | $T = 100 \text{ K}$                                                                  |
| $V = 4553 (2) \text{ \AA}^3$                                                                     | <u>Parallelepiped, colourless</u>                                                    |
| $Z = 4$                                                                                          | <u>0.12 × 0.08 × 0.02 mm</u>                                                         |
| $F(000) = 2120$                                                                                  |                                                                                      |
| Radiation source: <u>Mo micro-source</u>                                                         | $R_{\text{int}} = 0.056$                                                             |
| <u>Graphite monochromator</u>                                                                    | $\theta_{\text{max}} = 29.9^\circ, \theta_{\text{min}} = 1.5^\circ$                  |
| <u><math>\omega</math>-<math>\phi</math> scans</u>                                               | $h = -14 \quad 14$                                                                   |
| Absorption correction: <u>multi-scan</u><br>[c.f. r.h. blessing, acta cryst. (1995), a51, 33-38] | $k = -21 \quad 21$                                                                   |
| $T_{\text{min}} = 0.670, T_{\text{max}} = 0.746$                                                 | $l = -36 \quad 40$                                                                   |
| <u>106334</u> measured reflections                                                               | Standard reflections: <u>0</u>                                                       |
| <u>13093</u> independent reflections                                                             |                                                                                      |
| Refinement on <u><math>F^2</math></u>                                                            |                                                                                      |
| Least-squares matrix: <u>full</u>                                                                | Hydrogen site location: <u>inferred from neighbouring sites</u>                      |
| $R[F^2 > 2\sigma(F^2)] = 0.027$                                                                  | <u>H-atom parameters constrained</u>                                                 |
| $wR(F^2) = 0.059$                                                                                | $w = 1/[\sigma^2(F_o^2) + (0.0208P)^2 + 6.4502P]$<br>where $P = (F_o^2 + 2F_c^2)/3$  |
| $S = 1.08$                                                                                       | $(\Delta/\sigma)_{\text{max}} = 0.004$                                               |
| <u>13093</u> reflections                                                                         | $\Delta\rho_{\text{max}} = 1.75 \text{ e } \text{\AA}^{-3}$                          |
| <u>497</u> parameters                                                                            | $\Delta\rho_{\text{min}} = -1.35 \text{ e } \text{\AA}^{-3}$                         |
| <u>0</u> restraints                                                                              | Extinction correction: <u>none</u>                                                   |

### X-ray Data for complex 3

|                                        |                                 |
|----------------------------------------|---------------------------------|
| $M_r = 1038.77$                        | $D_x = 1.514 \text{ Mg m}^{-3}$ |
| <u>Monoclinic, <math>P2_1/c</math></u> |                                 |

|                                  |                                                                 |
|----------------------------------|-----------------------------------------------------------------|
| Hall symbol: <u>-P 2ybc</u>      | <u>Mo K<math>\alpha</math></u> radiation, $\lambda = 0.71073$ Å |
| $a = 10.2493$ (14) Å             | Cell parameters from <u>9606</u> reflections                    |
| $b = 22.784$ (3) Å               | $\theta = 2.3$ – <u>30.6</u> °                                  |
| $c = 19.998$ (3) Å               | $\mu = 3.15$ mm <sup>-1</sup>                                   |
| $\beta = 102.638$ (3)°           | $T = 100$ K                                                     |
| $V = 4556.8$ (11) Å <sup>3</sup> | <u>Block, orange</u>                                            |
| $Z = 4$                          | <u>0.18</u> × <u>0.14</u> × <u>0.09</u> mm                      |
| $F(000) = 2112$                  |                                                                 |

|                                                                                                  |                                                                        |
|--------------------------------------------------------------------------------------------------|------------------------------------------------------------------------|
| <u>Bruker Kappa APEX II</u><br><u>diffractometer</u>                                             | <u>8863</u> reflections with $I > 2\sigma(I)$                          |
| Radiation source: <u>micro-source</u>                                                            | $R_{\text{int}} = 0.042$                                               |
| <u>Graphite</u> monochromator                                                                    | $\theta_{\text{max}} = 26.4^\circ$ , $\theta_{\text{min}} = 1.4^\circ$ |
| $\omega$ – $\phi$ scans                                                                          | $h = -12$ $12$                                                         |
| Absorption correction: <u>multi-scan</u><br>[c.f. r.h. blessing, acta cryst. (1995), a51, 33-38] | $k = -28$ $28$                                                         |
| $T_{\text{min}} = 0.668$ , $T_{\text{max}} = 0.746$                                              | $l = -24$ $24$                                                         |
| <u>88526</u> measured reflections                                                                | Standard reflections: <u>0</u>                                         |
| <u>9289</u> independent reflections                                                              |                                                                        |

|                                   |                                                                                         |
|-----------------------------------|-----------------------------------------------------------------------------------------|
| Refinement on $F^2$               |                                                                                         |
| Least-squares matrix: <u>full</u> | Hydrogen site location: <u>inferred from neighbouring sites</u>                         |
| $R[F^2 > 2\sigma(F^2)] = 0.021$   | <u>H-atom parameters constrained</u>                                                    |
| $wR(F^2) = 0.046$                 | $w = 1/[\sigma^2(F_o^2) + 7.9453P]$<br><u>where <math>P = (F_o^2 + 2F_c^2)/3</math></u> |
| $S = 1.18$                        | $(\Delta/\sigma)_{\text{max}} = 0.007$                                                  |
| <u>9289</u> reflections           | $\Delta\rho_{\text{max}} = 0.66$ e Å <sup>-3</sup>                                      |
| <u>527</u> parameters             | $\Delta\rho_{\text{min}} = -0.75$ e Å <sup>-3</sup>                                     |
| <u>0</u> restraints               | Extinction correction: <u>none</u>                                                      |

#### X-ray Data for complex 4

|                                                                                                    |                                  |
|----------------------------------------------------------------------------------------------------|----------------------------------|
| <u>C<sub>42</sub>H<sub>62</sub>ClIrP<sub>2</sub>Si<sub>2</sub>·2(CH<sub>2</sub>Cl<sub>2</sub>)</u> |                                  |
| $M_r = 1082.61$                                                                                    | $D_x = 1.446$ Mg m <sup>-3</sup> |
| <u>Monoclinic, C2/c</u>                                                                            |                                  |

|                               |                                                                           |
|-------------------------------|---------------------------------------------------------------------------|
| Hall symbol: <u>-C 2yc</u>    | <u>Mo K<math>\alpha</math></u> radiation, $\lambda = 0.71073 \text{ \AA}$ |
| $a = 46.882 (14) \text{ \AA}$ | Cell parameters from <u>9156</u> reflections                              |
| $b = 10.431 (3) \text{ \AA}$  | $\theta = 2\text{--}30^\circ$                                             |
| $c = 22.858 (7) \text{ \AA}$  | $\mu = 3.10 \text{ mm}^{-1}$                                              |
| $\beta = 117.182 (6)^\circ$   | $T = 100 \text{ K}$                                                       |
| $V = 9943 (5) \text{ \AA}^3$  | <u>Plate, yellow</u>                                                      |
| $Z = 8$                       | <u>0.15</u> $\times$ <u>0.10</u> $\times$ <u>0.02</u> mm                  |
| $F(000) = 4400$               |                                                                           |

|                                                                 |                                                                        |
|-----------------------------------------------------------------|------------------------------------------------------------------------|
| <u>Bruker Kappa Apex2</u> diffractometer                        | <u>11555</u> reflections with $I > 2.0\sigma(I)$                       |
| Radiation source: <u>Mo</u> micro-source                        | $R_{\text{int}} = 0.057$                                               |
| <u>Graphite</u> monochromator                                   | $\theta_{\text{max}} = 30.0^\circ$ , $\theta_{\text{min}} = 1.0^\circ$ |
| $\varphi$ & $\omega$ scans                                      | $h = -64 \text{ } 65$                                                  |
| Absorption correction: <u>multi-scan SADABS</u> (Siemens, 1996) | $k = -14 \text{ } 14$                                                  |
| $T_{\text{min}} = 0.76$ , $T_{\text{max}} = 0.94$               | $l = -31 \text{ } 31$                                                  |
| <u>141996</u> measured reflections                              | Standard reflections: <u>0</u>                                         |
| <u>14265</u> independent reflections                            |                                                                        |

|                                   |                                                                                                                                                                                                                                                                                                                                                                                                                                      |
|-----------------------------------|--------------------------------------------------------------------------------------------------------------------------------------------------------------------------------------------------------------------------------------------------------------------------------------------------------------------------------------------------------------------------------------------------------------------------------------|
| Refinement on $F$                 |                                                                                                                                                                                                                                                                                                                                                                                                                                      |
| Least-squares matrix: <u>full</u> | Hydrogen site location: <u>difference Fourier map</u>                                                                                                                                                                                                                                                                                                                                                                                |
| $R[F^2 > 2\sigma(F^2)] = 0.047$   | <u>H-atom parameters not refined</u>                                                                                                                                                                                                                                                                                                                                                                                                 |
| $wR(F^2) = 0.052$                 | <u>Method, part 1, Chebychev polynomial, (Watkin, 1994, Prince, 1982) [weight] = 1.0/[A<sub>0</sub>*T<sub>0</sub>(x) + A<sub>1</sub>*T<sub>1</sub>(x) ... + A<sub>n-1</sub>]*T<sub>n-1</sub>(x)] where A<sub>i</sub> are the Chebychev coefficients listed below and x = F / Fmax Method = Robust Weighting (Prince, 1982) W = [weight] * [1-(deltaF/6*sigmaF)<sup>2</sup>]<sup>2</sup> A<sub>i</sub> are: 1.48 -0.824E-01 0.970</u> |
| $S = 1.15$                        | $(\Delta/\sigma)_{\text{max}} = 0.004$                                                                                                                                                                                                                                                                                                                                                                                               |
| <u>11555</u> reflections          | $\Delta\rho_{\text{max}} = 5.59 \text{ e \AA}^{-3}$                                                                                                                                                                                                                                                                                                                                                                                  |
| <u>496</u> parameters             | $\Delta\rho_{\text{min}} = -3.19 \text{ e \AA}^{-3}$                                                                                                                                                                                                                                                                                                                                                                                 |
| <u>0</u> restraints               | Extinction correction: <u>None</u>                                                                                                                                                                                                                                                                                                                                                                                                   |

#### X-ray Data for complex 5a

|                                                                                                    |                                 |
|----------------------------------------------------------------------------------------------------|---------------------------------|
| <u>C<sub>28</sub>H<sub>35</sub>ClIrN<sub>2</sub>PSi<sub>2</sub>·2(C<sub>2</sub>H<sub>3</sub>N)</u> |                                 |
| $M_r = 796.52$                                                                                     | $D_x = 1.513 \text{ Mg m}^{-3}$ |
| <u>Monoclinic, P2<sub>1</sub>/n</u>                                                                |                                 |

|                                |                                                                           |
|--------------------------------|---------------------------------------------------------------------------|
| Hall symbol: <u>-P 2yn</u>     | <u>Mo K<math>\alpha</math></u> radiation, $\lambda = 0.71073 \text{ \AA}$ |
| $a = 14.0609 (6) \text{ \AA}$  | Cell parameters from <u>9908</u> reflections                              |
| $b = 9.4670 (4) \text{ \AA}$   | $\theta = 2-26^\circ$                                                     |
| $c = 27.1645 (11) \text{ \AA}$ | $\mu = 4.04 \text{ mm}^{-1}$                                              |
| $\beta = 104.790 (1)^\circ$    | $T = 100 \text{ K}$                                                       |
| $V = 3496.2 (3) \text{ \AA}^3$ | <u>Plate, yellow</u>                                                      |
| $Z = 4$                        | <u>0.15</u> $\times$ <u>0.10</u> $\times$ <u>0.03</u> mm                  |
| $F(000) = 1591.991$            |                                                                           |

|                                                                           |                                                                        |
|---------------------------------------------------------------------------|------------------------------------------------------------------------|
| <u>Bruker Kappa Apex2</u><br><u>diffractometer</u>                        | <u>6137</u> reflections with $I > 2.0\sigma(I)$                        |
| Radiation source: ?                                                       | $R_{\text{int}} = 0.063$                                               |
| <u>Graphite</u> monochromator                                             | $\theta_{\text{max}} = 26.4^\circ$ , $\theta_{\text{min}} = 1.6^\circ$ |
| $\varphi$ & $\omega$ scans                                                | $h = -17 \quad 16$                                                     |
| Absorption correction: <u>multi-scan</u><br><u>SADABS</u> (Siemens, 1996) | $k = -11 \quad 11$                                                     |
| $T_{\text{min}} = 0.73$ , $T_{\text{max}} = 0.89$                         | $l = -30 \quad 33$                                                     |
| <u>61092</u> measured reflections                                         | Standard reflections: <u>0</u>                                         |
| <u>7152</u> independent reflections                                       |                                                                        |

|                                   |                                                                                                                                                                                                                                                                                                                                                                                                                                         |
|-----------------------------------|-----------------------------------------------------------------------------------------------------------------------------------------------------------------------------------------------------------------------------------------------------------------------------------------------------------------------------------------------------------------------------------------------------------------------------------------|
| Refinement on $F$                 |                                                                                                                                                                                                                                                                                                                                                                                                                                         |
| Least-squares matrix: <u>full</u> | Hydrogen site location: <u>difference Fourier map</u>                                                                                                                                                                                                                                                                                                                                                                                   |
| $R[F^2 > 2\sigma(F^2)] = 0.024$   | <u>H-atom parameters not refined</u>                                                                                                                                                                                                                                                                                                                                                                                                    |
| $wR(F^2) = 0.024$                 | <u>Method, part 1, Chebychev polynomial, (Watkin, 1994, Prince, 1982) [weight] = 1.0/[A<sub>0</sub>*T<sub>0</sub>(x) + A<sub>1</sub>*T<sub>1</sub>(x) ... + A<sub>n-1</sub>*T<sub>n-1</sub>(x)] where A<sub>i</sub> are the Chebychev coefficients listed below and x = F / Fmax Method = Robust Weighting (Prince, 1982) W = [weight] * [1-(deltaF/6*sigmaF)<sup>2</sup>]<sup>2</sup> A<sub>i</sub> are: 0.203 0.522E-01 0.937E-01</u> |
| $S = 1.10$                        | $(\Delta/\sigma)_{\text{max}} = 0.002$                                                                                                                                                                                                                                                                                                                                                                                                  |
| <u>5830</u> reflections           | $\Delta\rho_{\text{max}} = 0.69 \text{ e \AA}^{-3}$                                                                                                                                                                                                                                                                                                                                                                                     |
| <u>370</u> parameters             | $\Delta\rho_{\text{min}} = -0.48 \text{ e \AA}^{-3}$                                                                                                                                                                                                                                                                                                                                                                                    |
| <u>0</u> restraints               | Extinction correction: <u>None</u>                                                                                                                                                                                                                                                                                                                                                                                                      |

### X-ray Data for complex 7b

|                                                                     |                |
|---------------------------------------------------------------------|----------------|
| <u>C<sub>26</sub>H<sub>29</sub>ClIrO<sub>2</sub>PSi<sub>2</sub></u> | $F(000) = 676$ |
|---------------------------------------------------------------------|----------------|

|                                |                                                                           |
|--------------------------------|---------------------------------------------------------------------------|
| $M_r = 688.33$                 |                                                                           |
| <u>Triclinic, P-1</u>          | $D_x = 1.728 \text{ Mg m}^{-3}$                                           |
| Hall symbol: -P 1              |                                                                           |
| $a = 9.7364 (12) \text{ \AA}$  | <u>Mo K<math>\alpha</math></u> radiation, $\lambda = 0.71073 \text{ \AA}$ |
| $b = 9.9162 (14) \text{ \AA}$  | Cell parameters from <u>9757</u> reflections                              |
| $c = 14.706 (2) \text{ \AA}$   | $\theta = 2-26^\circ$                                                     |
| $\alpha = 82.877 (5)^\circ$    | $\mu = 5.32 \text{ mm}^{-1}$                                              |
| $\beta = 72.789 (4)^\circ$     | $T = 293 \text{ K}$                                                       |
| $\gamma = 77.865 (4)^\circ$    | <u>Needle, colourless</u>                                                 |
| $V = 1323.0 (3) \text{ \AA}^3$ | <u>0.20</u> $\times$ <u>0.03</u> $\times$ <u>0.02</u> mm                  |
| $Z = 2$                        |                                                                           |

|                                                                 |                                                                        |
|-----------------------------------------------------------------|------------------------------------------------------------------------|
| <u>Bruker Kappa Apex2 diffractometer</u>                        | <u>4978</u> reflections with $I > 2.0\sigma(I)$                        |
| Radiation source: <u>Mo micro-source</u>                        | $R_{\text{int}} = 0.061$                                               |
| <u>Graphite monochromator</u>                                   | $\theta_{\text{max}} = 26.5^\circ$ , $\theta_{\text{min}} = 1.5^\circ$ |
| $\varphi$ & $\omega$ scans                                      | $h = -12 \quad 12$                                                     |
| Absorption correction: <u>multi-scan SADABS (Siemens, 1996)</u> | $k = -12 \quad 12$                                                     |
| $T_{\text{min}} = 0.68$ , $T_{\text{max}} = 0.90$               | $l = -18 \quad 18$                                                     |
| <u>54275</u> measured reflections                               | Standard reflections: <u>0</u>                                         |
| <u>5457</u> independent reflections                             |                                                                        |

|                                   |                                                                                                                                                                                                                                                                                                                                                                                                                                                                                |
|-----------------------------------|--------------------------------------------------------------------------------------------------------------------------------------------------------------------------------------------------------------------------------------------------------------------------------------------------------------------------------------------------------------------------------------------------------------------------------------------------------------------------------|
| Refinement on $F$                 |                                                                                                                                                                                                                                                                                                                                                                                                                                                                                |
| Least-squares matrix: <u>full</u> | Hydrogen site location: <u>difference Fourier map</u>                                                                                                                                                                                                                                                                                                                                                                                                                          |
| $R[F^2 > 2\sigma(F^2)] = 0.026$   | <u>H-atom parameters not refined</u>                                                                                                                                                                                                                                                                                                                                                                                                                                           |
| $wR(F^2) = 0.028$                 | <u>Method, part 1, Chebychev polynomial, (Watkin, 1994, Prince, 1982) [weight] = 1.0/[A<sub>0</sub>*T<sub>0</sub>(x) + A<sub>1</sub>*T<sub>1</sub>(x) ... + A<sub>n-1</sub>]*T<sub>n-1</sub>(x)] where A<sub>i</sub> are the Chebychev coefficients listed below and <math>x = F/F_{\text{max}}</math> Method = Robust Weighting (Prince, 1982) <math>W = [\text{weight}] * [1 - (\text{delta}F/6 * \text{sigma}F)^2]^2</math> A<sub>i</sub> are: <u>1.46 -0.668 0.987</u></u> |
| $S = 1.09$                        | $(\Delta/\sigma)_{\text{max}} = 0.002$                                                                                                                                                                                                                                                                                                                                                                                                                                         |
| <u>4865</u> reflections           | $\Delta\rho_{\text{max}} = 2.36 \text{ e \AA}^{-3}$                                                                                                                                                                                                                                                                                                                                                                                                                            |
| <u>298</u> parameters             | $\Delta\rho_{\text{min}} = -0.78 \text{ e \AA}^{-3}$                                                                                                                                                                                                                                                                                                                                                                                                                           |
| <u>0</u> restraints               | Extinction correction: <u>None</u>                                                                                                                                                                                                                                                                                                                                                                                                                                             |

## X-ray Data for complex 8

|                                                                                                              |                                                                           |
|--------------------------------------------------------------------------------------------------------------|---------------------------------------------------------------------------|
| <u>C<sub>48</sub>H<sub>59</sub>ClIr<sub>2</sub>P<sub>2</sub>Si<sub>4</sub>·2(C<sub>6</sub>H<sub>6</sub>)</u> | $F(000) = 1376$                                                           |
| $M_r = 1386.31$                                                                                              |                                                                           |
| <u>Triclinic</u> , P -1                                                                                      | $D_x = 1.64 \text{ Mg m}^{-3}$                                            |
| Hall symbol: <u>-P 1</u>                                                                                     |                                                                           |
| $a = 12.2965 (6) \text{ \AA}$                                                                                | <u>Mo K<math>\alpha</math></u> radiation, $\lambda = 0.71073 \text{ \AA}$ |
| $b = 12.8675 (6) \text{ \AA}$                                                                                | Cell parameters from <u>9239</u> reflections                              |
| $c = 18.4988 (9) \text{ \AA}$                                                                                | $\theta = 2.6\text{--}28.3^\circ$                                         |
| $\alpha = 84.086 (1)^\circ$                                                                                  | $\mu = 4.96 \text{ mm}^{-1}$                                              |
| $\beta = 87.716 (1)^\circ$                                                                                   | $T = 100 \text{ K}$                                                       |
| $\gamma = 74.647 (1)^\circ$                                                                                  | <u>Parallelepiped</u> , <u>yellow</u>                                     |
| $V = 2807.3 (2) \text{ \AA}^3$                                                                               | <u>0.08</u> $\times$ <u>0.05</u> $\times$ <u>0.02</u> mm                  |
| $Z = 2$                                                                                                      |                                                                           |

|                                                                                                  |                                                                        |
|--------------------------------------------------------------------------------------------------|------------------------------------------------------------------------|
| Radiation source: <u>?</u>                                                                       | $R_{\text{int}} = 0.038$                                               |
| <u>Graphite</u> monochromator                                                                    | $\theta_{\text{max}} = 28.3^\circ$ , $\theta_{\text{min}} = 2.9^\circ$ |
| <u><math>\omega</math>-<math>\phi</math> scans</u>                                               | $h = -16 \quad 16$                                                     |
| Absorption correction: <u>multi-scan</u><br>[c.f. r.h. blessing, acta cryst. (1995), a51, 33-38] | $k = -17 \quad 17$                                                     |
| $T_{\text{min}} = 0.654$ , $T_{\text{max}} = 0.746$                                              | $l = -24 \quad 24$                                                     |
| <u>62177</u> measured reflections                                                                | Standard reflections: <u>0</u>                                         |
| <u>13948</u> independent reflections                                                             |                                                                        |

|                                       |                                                                                    |
|---------------------------------------|------------------------------------------------------------------------------------|
| Refinement on <u><math>F^2</math></u> |                                                                                    |
| Least-squares matrix: <u>full</u>     | Hydrogen site location: <u>mixed</u>                                               |
| $R[F^2 > 2\sigma(F^2)] = 0.016$       | <u>H atoms treated by a mixture of independent and constrained refinement</u>      |
| $wR(F^2) = 0.039$                     | $w = 1/[\sigma^2(F_o^2) + (0.006P)^2 + 1.8867P]$<br>where $P = (F_o^2 + 2F_c^2)/3$ |
| $S = 1.03$                            | $(\Delta/\sigma)_{\text{max}} = 0.007$                                             |
| <u>13948</u> reflections              | $\Delta\rho_{\text{max}} = 0.48 \text{ e \AA}^{-3}$                                |
| <u>634</u> parameters                 | $\Delta\rho_{\text{min}} = -0.38 \text{ e \AA}^{-3}$                               |
| <u>0</u> restraints                   | Extinction correction: <u>none</u>                                                 |
